# Supplementary material for: Pannexin 1 targets mitophagy to mediate renal ischemia/reperfusion injury
Source: PubMed Central journal article supplement (PMC10465551; doi:10.1038/s42003-023-05226-x), 2023-08-29

# **Pannexin 1 targets mitophagy to mediate renal ischemia/reperfusion injury**

**Lianjiu Su<sup>1,2,3#\*</sup>, Jiahao Zhang<sup>1#</sup>, Jing Wang<sup>1,2#</sup>, Xiaozhan Wang<sup>1,2#</sup>, Edward Cao<sup>3</sup>, Chen Yang<sup>1</sup>, Qihao Sun<sup>3</sup>,  
Ramadoss Sivakumar<sup>3</sup>, Zhiyong Peng<sup>1,2,4\*</sup>**

<sup>1</sup>Department of Critical Care Medicine, Zhongnan Hospital of Wuhan University, Wuhan 430071, Hubei, China.

<sup>2</sup>Clinical Research Center of Hubei Critical Care Medicine, Wuhan, China.

<sup>3</sup>Department of Cardiology, David Geffen School of Medicine, University of California, Los Angeles, California, USA

<sup>4</sup>Center of Critical Care Nephrology, Department of Critical Care Medicine, University of Pittsburgh Medical Center, Pittsburgh, PA 15206

# Authors contributed equally to this study and therefore shared the first author role

\* Correspondence to: Zhiyong Peng, MD, PhD. E-mail: [pengzy5@hotmail.com](mailto:pengzy5@hotmail.com) and Lianjiu Su, MD, PhD. E-mail: [sulianjiu@whu.edu.cn](mailto:sulianjiu@whu.edu.cn). Department of Critical Care Medicine Zhongnan Hospital of Wuhan University 169 Donghu Rd, Wuchang District Wuhan 430071, Hubei province, China.

## Supplementary Table 1

**Supplementary Table 1: Antibodies for immunoblot analyses.**

| <b>Antibody</b>        | <b>Cat No.</b> | <b>Manufacturer</b>       | <b>species</b> | <b>dilution</b> |
|------------------------|----------------|---------------------------|----------------|-----------------|
| PANX1                  | 12595-1-AP     | Proteintech               | rabbit         | 1:1000          |
| PANX1                  | #91137         | Cell Signaling Technology | rabbit         | 1:1000          |
| PANX1                  | sc-293210      | Santa Cruz                | mouse          | 1:200           |
| GAPDH                  | 60004-1-Ig     | Proteintech               | mouse          | 1:50000         |
| LC3B                   | 18725-1-AP     | Proteintech               | rabbit         | 1:500           |
| LC3                    | 14600-1-AP     | Proteintech               | rabbit         | 1:1000          |
| P62                    | 18420-1-AP     | Proteintech               | rabbit         | 1:5000          |
| TOM20                  | 11802-1-AP     | Proteintech               | rabbit         | 1:2000          |
| TIM23                  | 67535-1-Ig     | Proteintech               | mouse          | 1:2000          |
| PINK                   | DF7742         | Affinity                  | rabbit         | 1:1000          |
| PARKIN                 | AF0235         | Affinity                  | rabbit         | 1:1000          |
| Caspase 3              | 19677-1-AP     | Proteintech               | rabbit         | 1:1000          |
| Bax                    | 50599-2-Ig     | Proteintech               | rabbit         | 1:1000          |
| Bcl2                   | 26593-1-AP     | Proteintech               | rabbit         | 1:1000          |
| mTOR                   | #2972          | Cell Signaling Technology | rabbit         | 1:1000          |
| Phospho-mTOR (Ser2448) | #5536          | Cell Signaling Technology | rabbit         | 1:1000          |
| Phospho-mTOR (Ser2481) | #2974          | Cell Signaling Technology | rabbit         | 1:1000          |
| Phospho-p70 S6 Kinase  | AF3228         | Affinity                  | rabbit         | 1:1000          |
| Phospho-ULK1           | AF4387         | Affinity                  | rabbit         | 1:1000          |
| Phospho-4E-BP1         | AF3432         | Affinity                  | rabbit         | 1:1000          |
| p70 S6 Kinase          | AF6226         | Affinity                  | rabbit         | 1:1000          |
| ULK1                   | AF7588         | Affinity                  | rabbit         | 1:2000          |
| 4E-BP1                 | AF4387         | Affinity                  | rabbit         | 1:1000          |

## Supplementary Table 2

Supplementary Table 2: Primers for Real-time PCR detection.

| Gene                 |   | Sequence5'---3'            |
|----------------------|---|----------------------------|
| <i>PANXI (mouse)</i> | F | CTTCACTCTCGGACGAGTTTC      |
| <i>PANXI (mouse)</i> | R | GGAATCAGCAGAGCATACACAAT    |
| <i>PANXI (human)</i> | F | GCTCTTTGCGATCCTCCTGTA      |
| <i>PANXI (human)</i> | R | TGCACGGTTGTAAACTTTGTCAA    |
| <i>GAPDH (mouse)</i> | F | AGGTCGGTGTGAACGGATTTG      |
| <i>GAPDH (mouse)</i> | R | GGGGTCGTTGATGGCAACA        |
| <i>GAPDH (human)</i> | F | GAAGGTGAAGGTCGGAGTC        |
| <i>GAPDH (human)</i> | R | GAAGATGGTGTGATGGGATTTTC    |
| <i>P2Y2 (human)</i>  | F | CGTGGCCTACAGCTCAGTC        |
| <i>P2Y2 (human)</i>  | R | GTGACGTGGAATGGCAGGAA       |
| <i>ATG13 (human)</i> | F | TAGGCGGCATGCGAGGCTACGC     |
| <i>ATG13 (human)</i> | R | ATCGGCTAGCTAGCTACGATA      |
| <i>Kim-1 (mouse)</i> | F | AAACCAGAGATTCCCACACG       |
| <i>Kim-1 (mouse)</i> | R | GTCGTGGGTCTTCCTGTAGC       |
| <i>NGAL (mouse)</i>  | F | CCATCTATGAGCTACAAGAGAACAAT |
| <i>NGAL (mouse)</i>  | R | TCTGATCCAGTAGCGACAGC       |

# Supplementary Figure 1

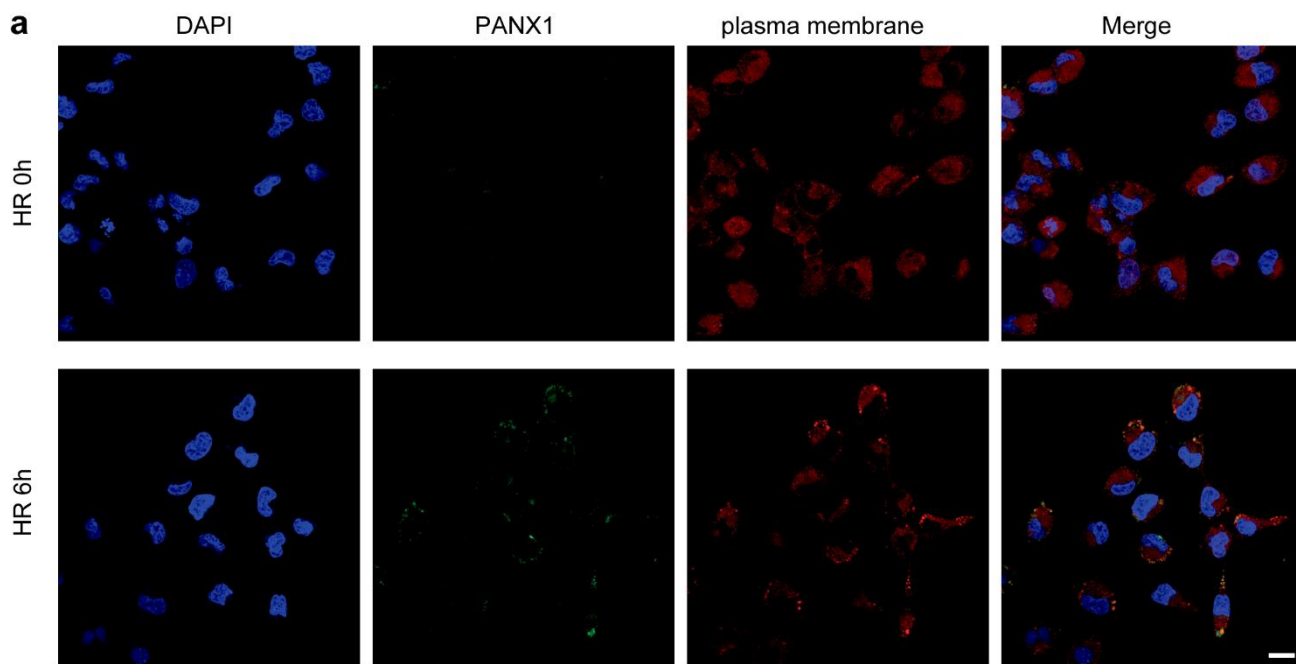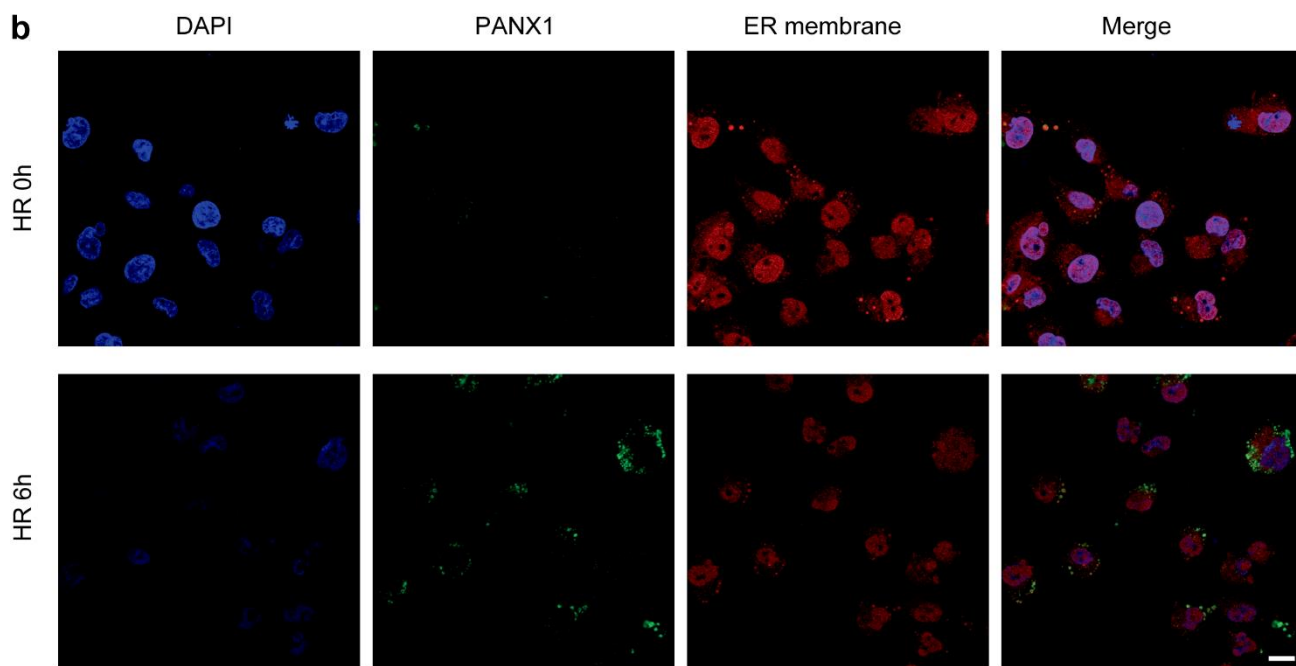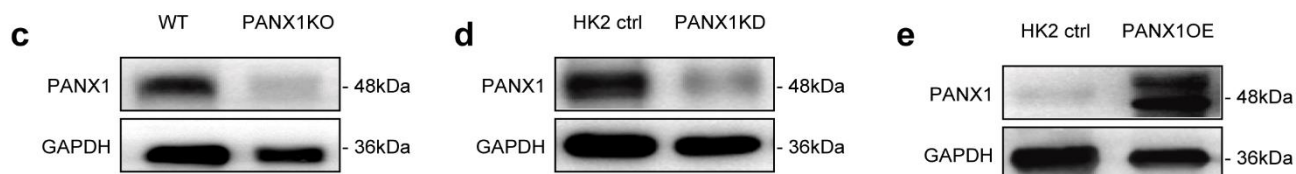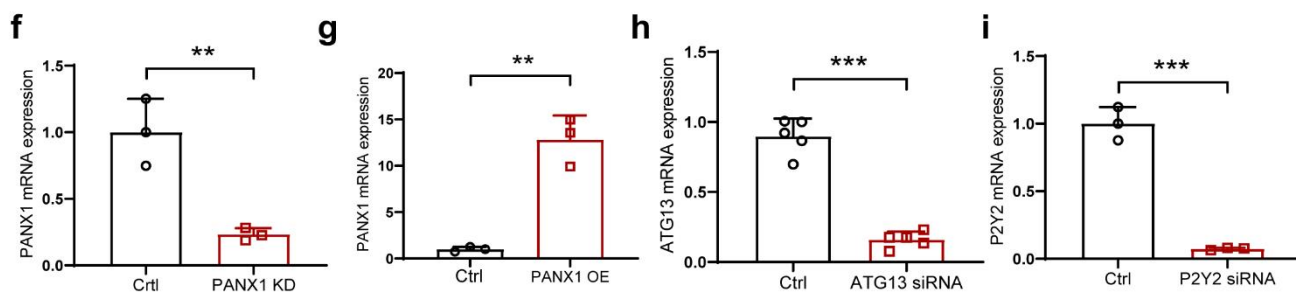

## Supplementary Figure 1

---

**Supplementary Figure 1:** (a) Laser confocal scanning microscopy for PANX1 and plasma membrane staining (Bar=20 $\mu$ m). (b) Laser confocal scanning microscopy for PANX1 and endoplasmic reticulum staining (Bar=20 $\mu$ m). (c) Western blot for PANX1 in WT and PANX1<sup>-/-</sup> mice. (d) Western blot for PANX1 in HK2 ctrl and PANX1KD. (e) Western blot PANX1 in HK2 empty and PANX1OE. (f) qRT-PCR for PANX1 in HK2 ctrl and PANX1KD (n=3). (g) qRT-PCR for PANX1 in HK2 empty and PANX1OE (n=3). (h) qRT-PCR for ATG13 in HK2 ctrl and ATG13 siRNA (n=5). (i) qRT-PCR for P2Y2 in HK2 ctrl and P2Y2 siRNA (n=5). GAPDH served as the loading control. Results are presented as means  $\pm$  SEM. P values from Student's t test. \* indicates p<0.05; \*\* indicates p<0.01; \*\*\* indicates p<0.001.

## Supplementary Figure 2

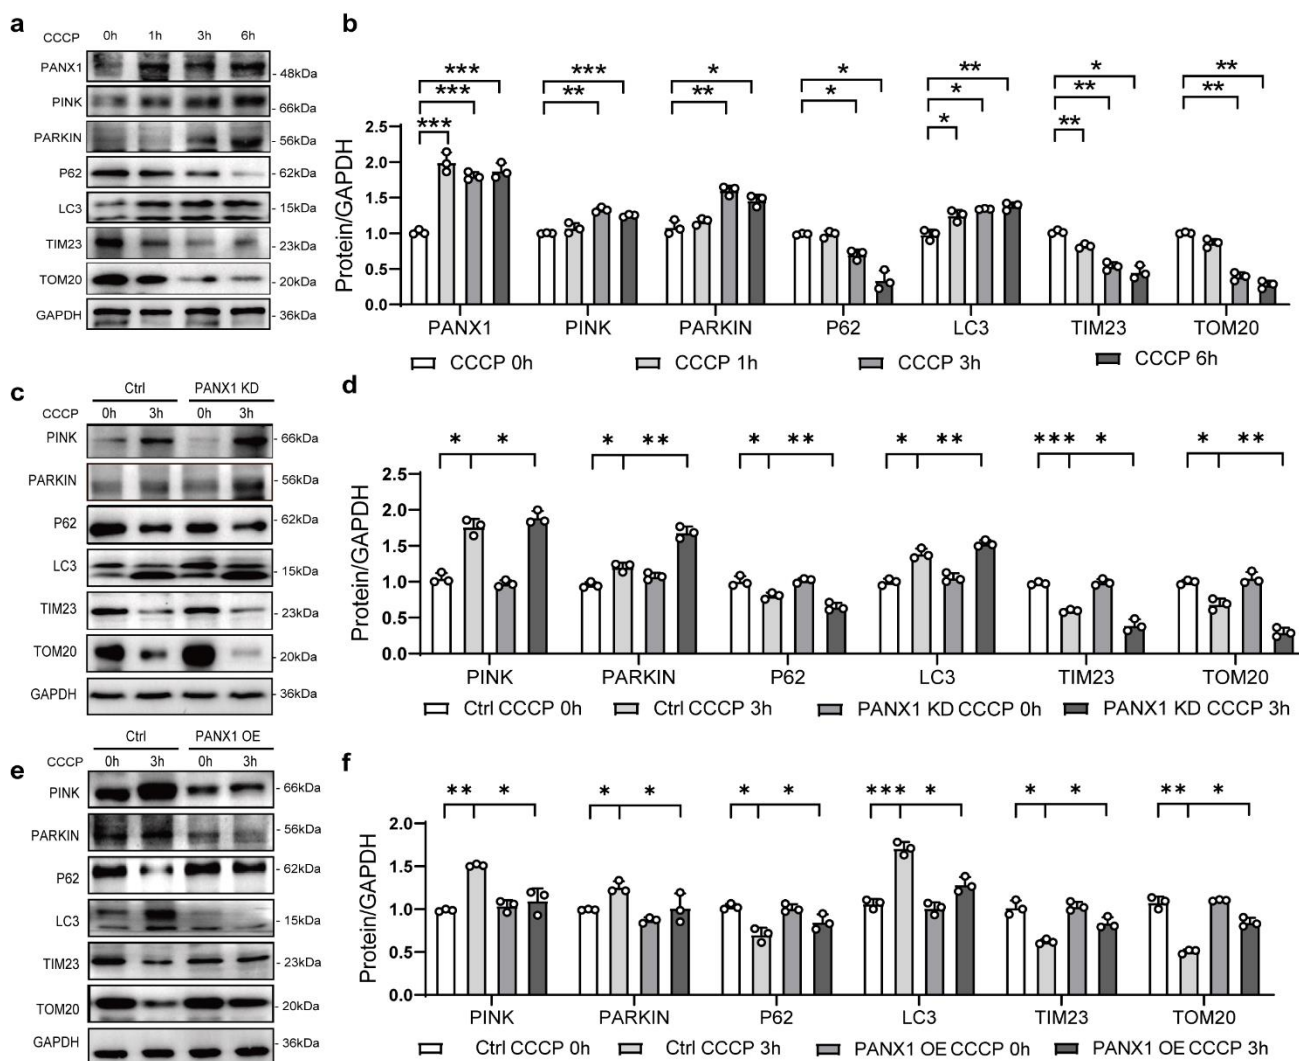

**Supplemental Fig. 2.** (a, b) Western blot measured the protein levels of mitophagy-related proteins in HK2 cells subjected to CCCP for the indicated time points (n=3). Results are presented as means  $\pm$  SEM. P values from One-way ANOVA with Dunnett's multiple comparisons test. (c-f) Western blot indicated the levels of mitophagy-related proteins in PANX1KD and PANX1OE cells treated with CCCP (n=3). Results are presented as means  $\pm$  SEM. P values from Student's t test. GAPDH served as the loading control. \* indicates  $p < 0.05$ ; \*\* indicates  $p < 0.01$ ; \*\*\* indicates  $p < 0.001$ .

Supplementary Figure 3. Gating strategy

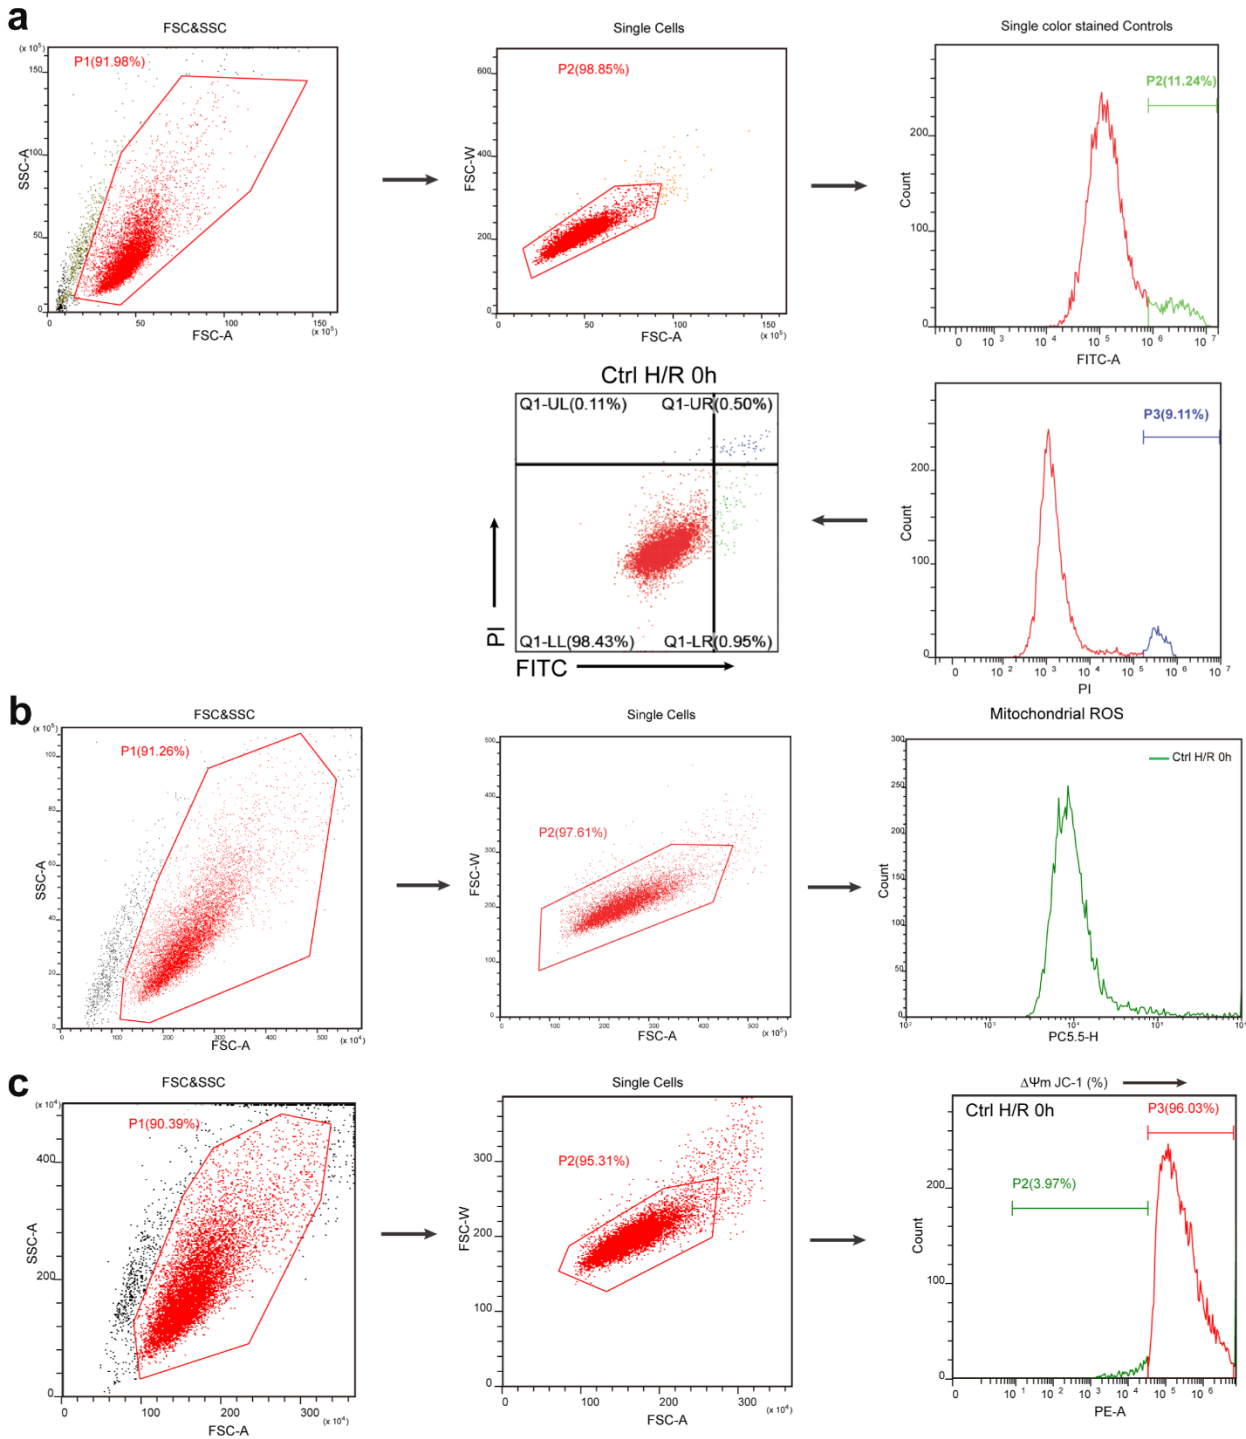

**Supplemental Fig. 3.** (a) Gating strategy for apoptotic cell death in Fig. 3h. (b) Gating strategy for mitochondrial ROS in Fig. 4b. (b) Gating strategy for JC-1 in Fig. 4d.

## Supplementary Figure 4. Original blot images

### Figure 2a

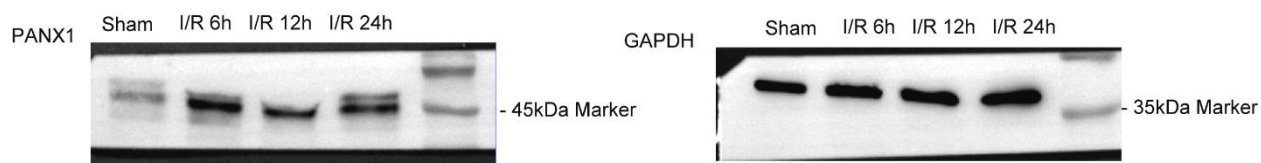

### Figure 2d

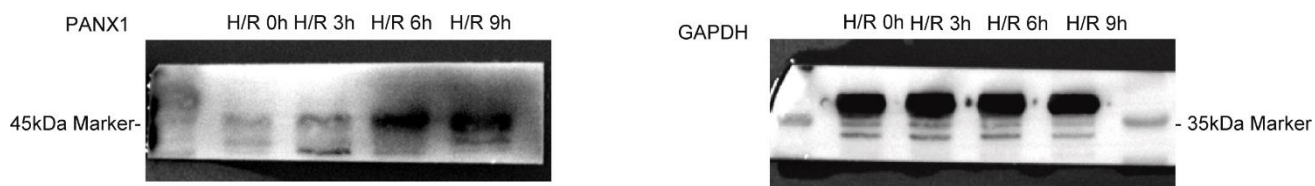

### Figure 3f

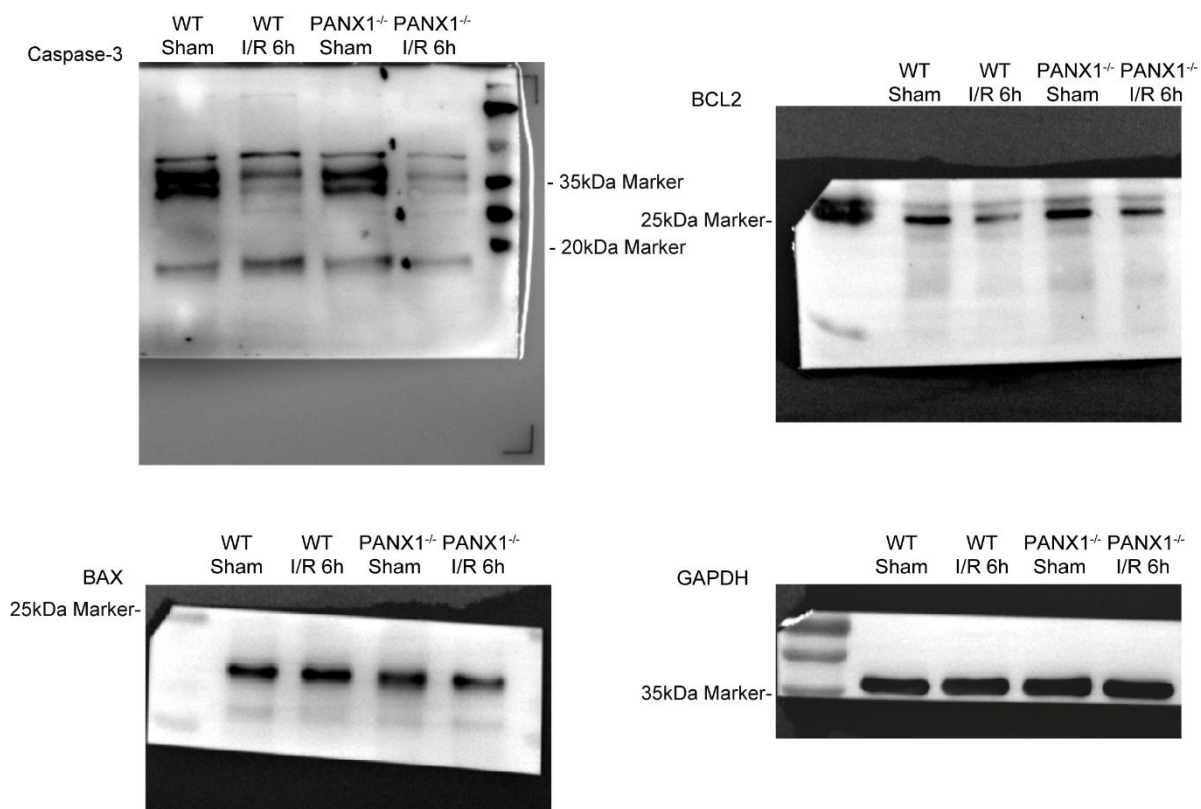



## Supplementary Figure 4. Original blot images

### Figure 3j

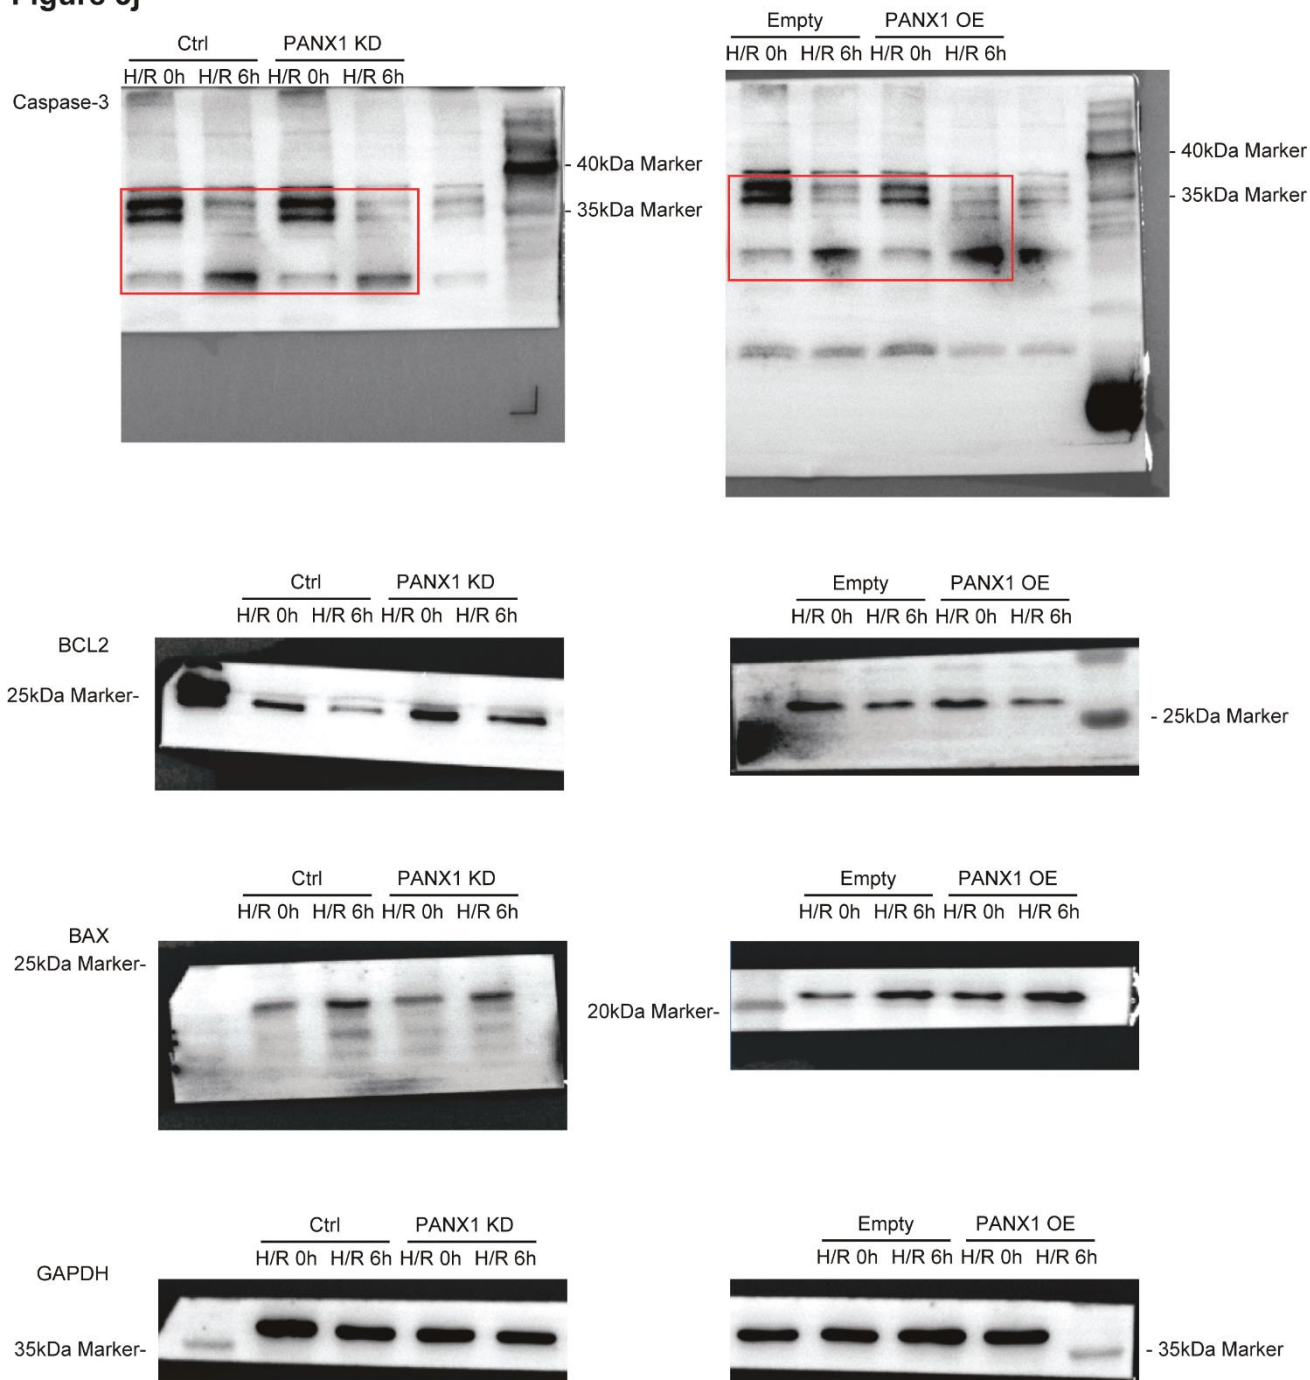

Supplementary Figure 4. Original blot images

Figure 5a

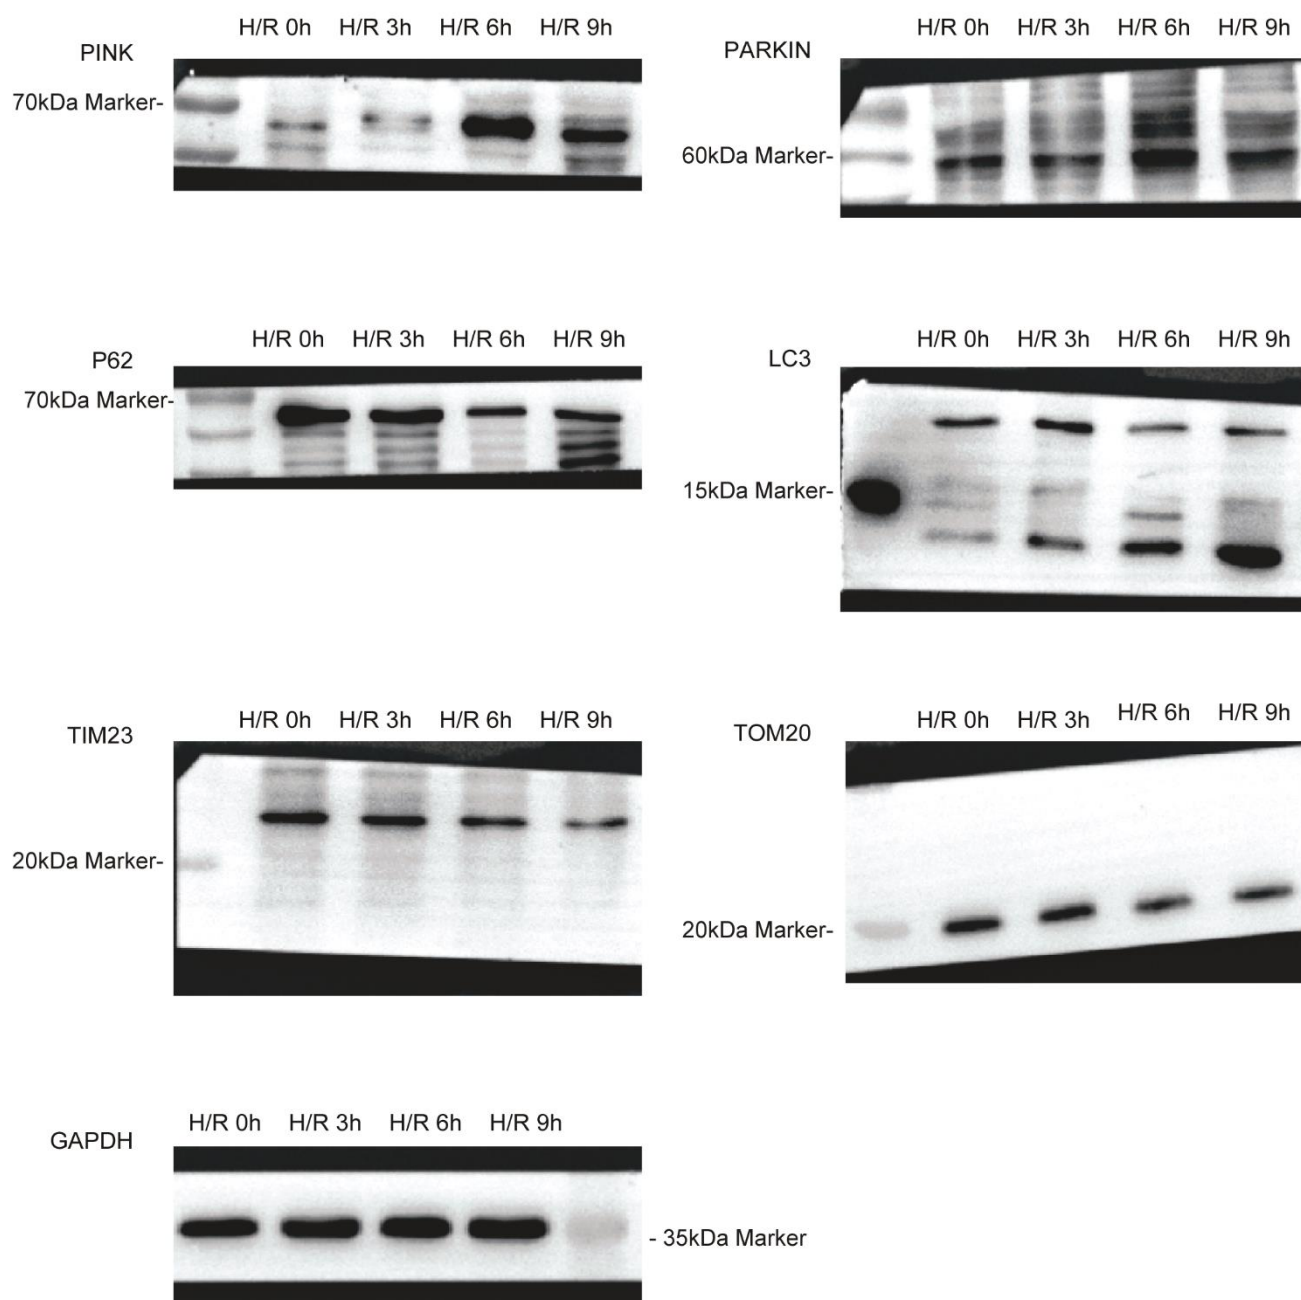

Supplementary Figure 4. Original blot images

Figure 5e

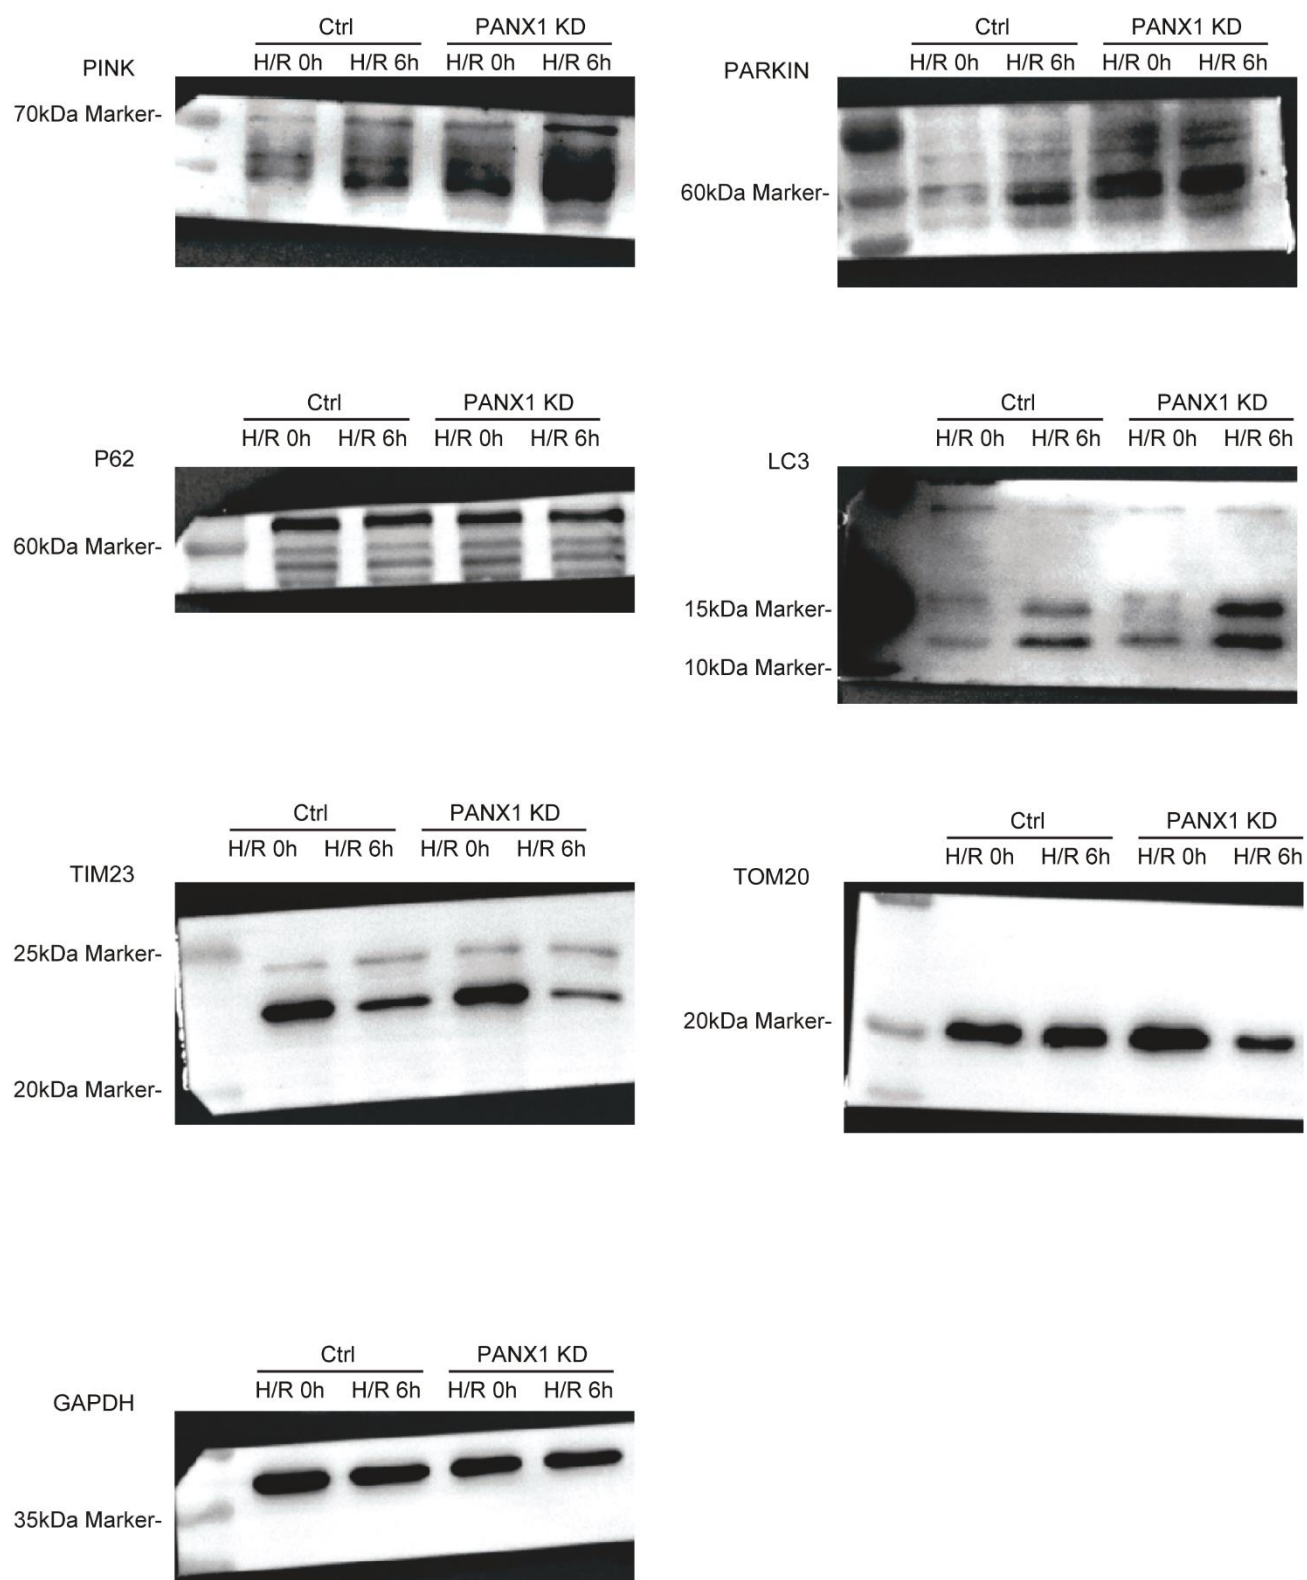

## Supplementary Figure 4. Original blot images

Figure 5g

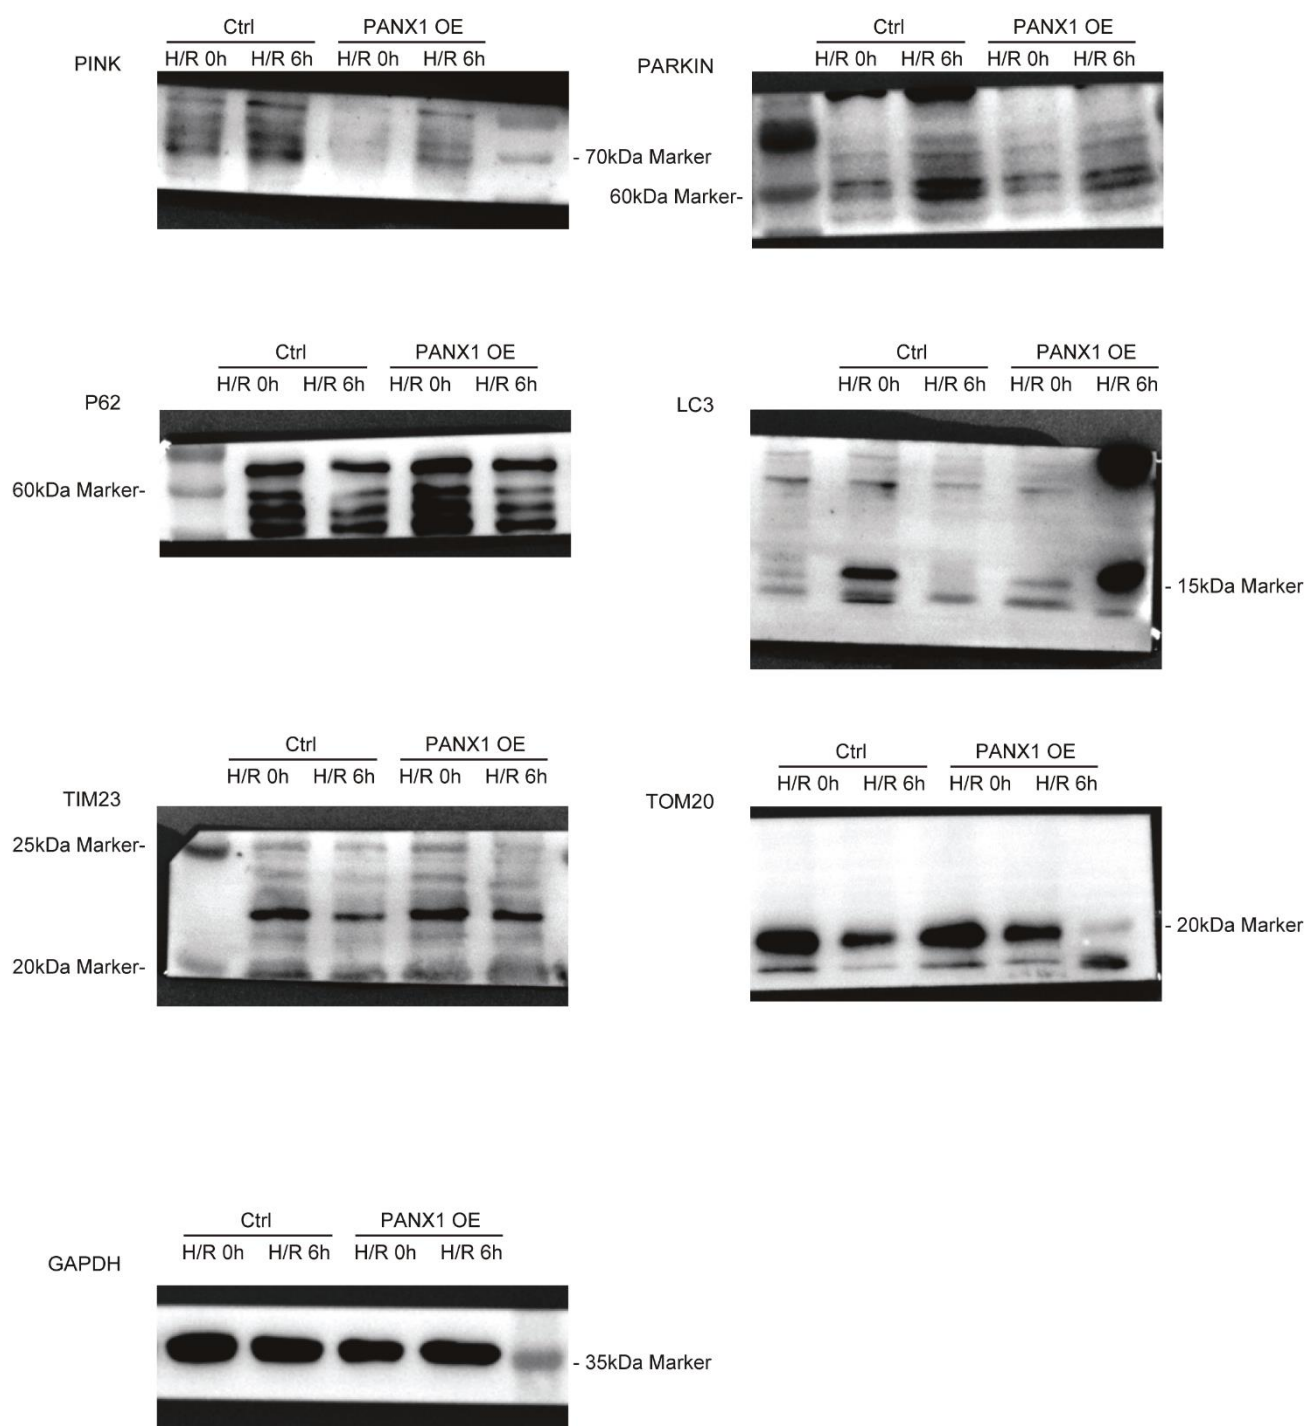

Supplementary Figure 4. Original blot images

Figure 5k

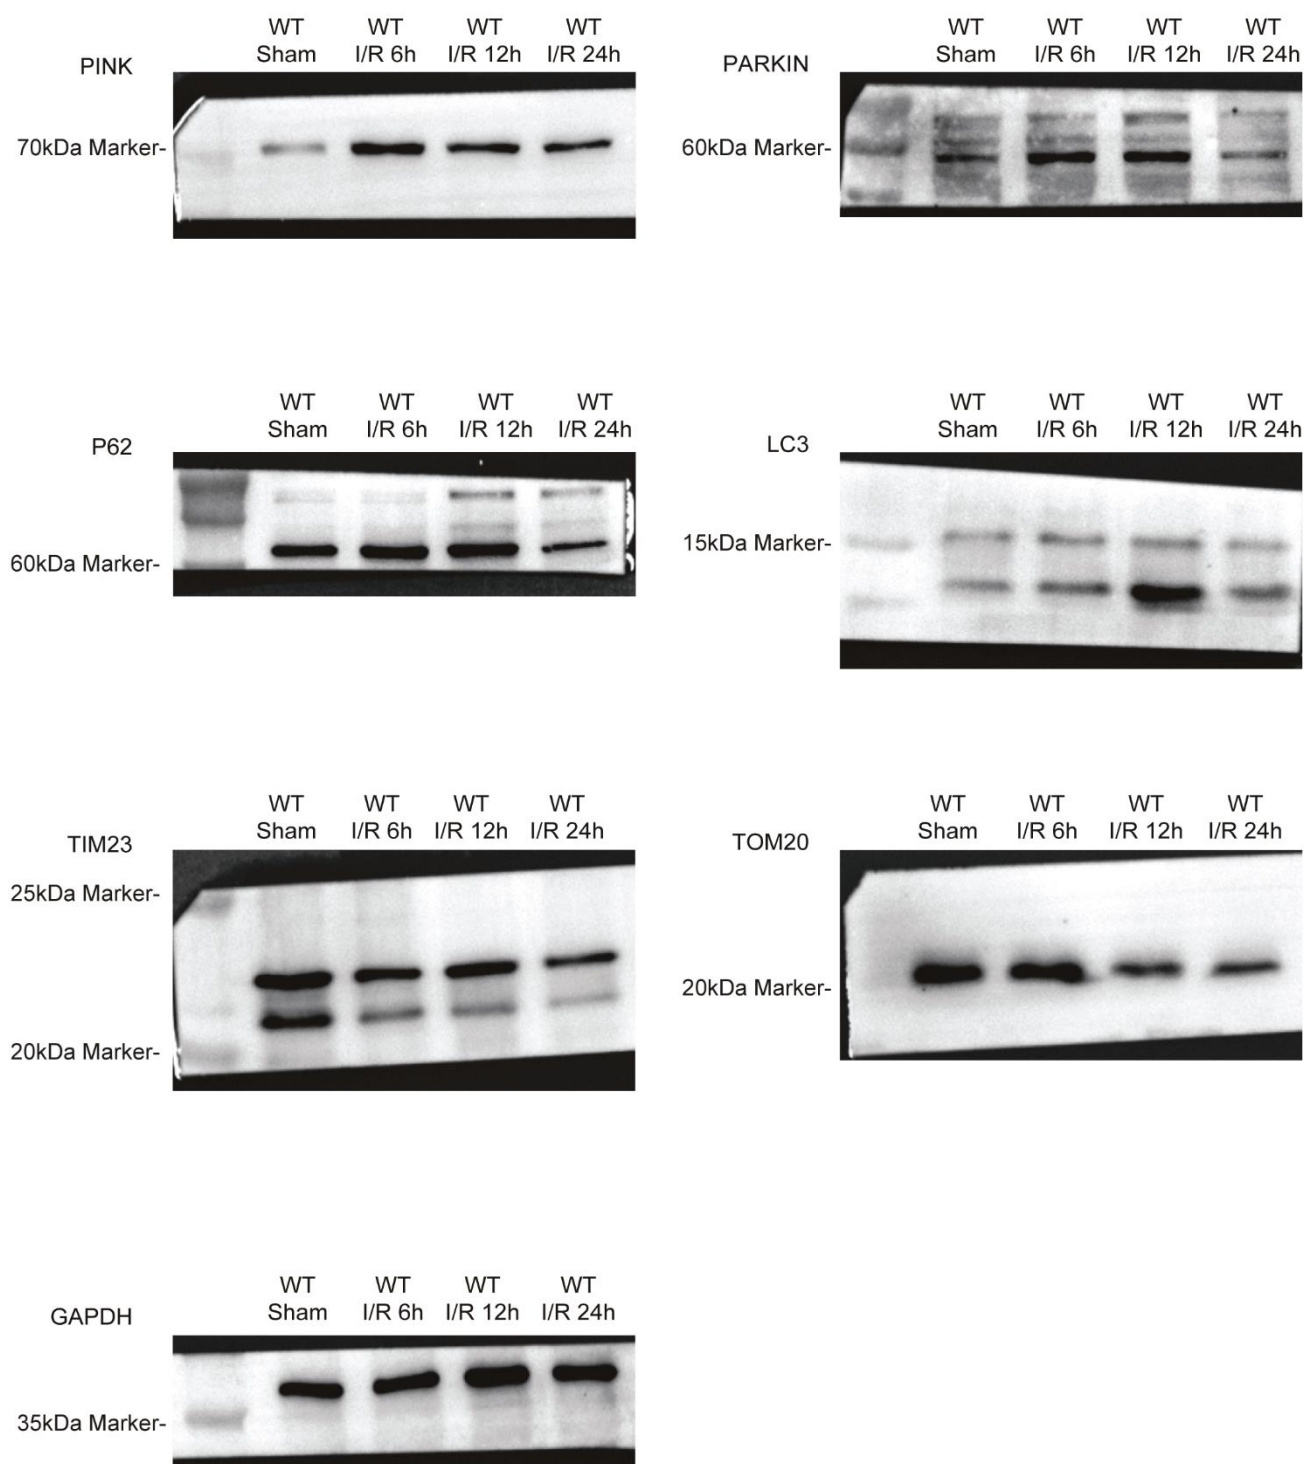



## Supplementary Figure 4. Original blot images

### Figure 5m

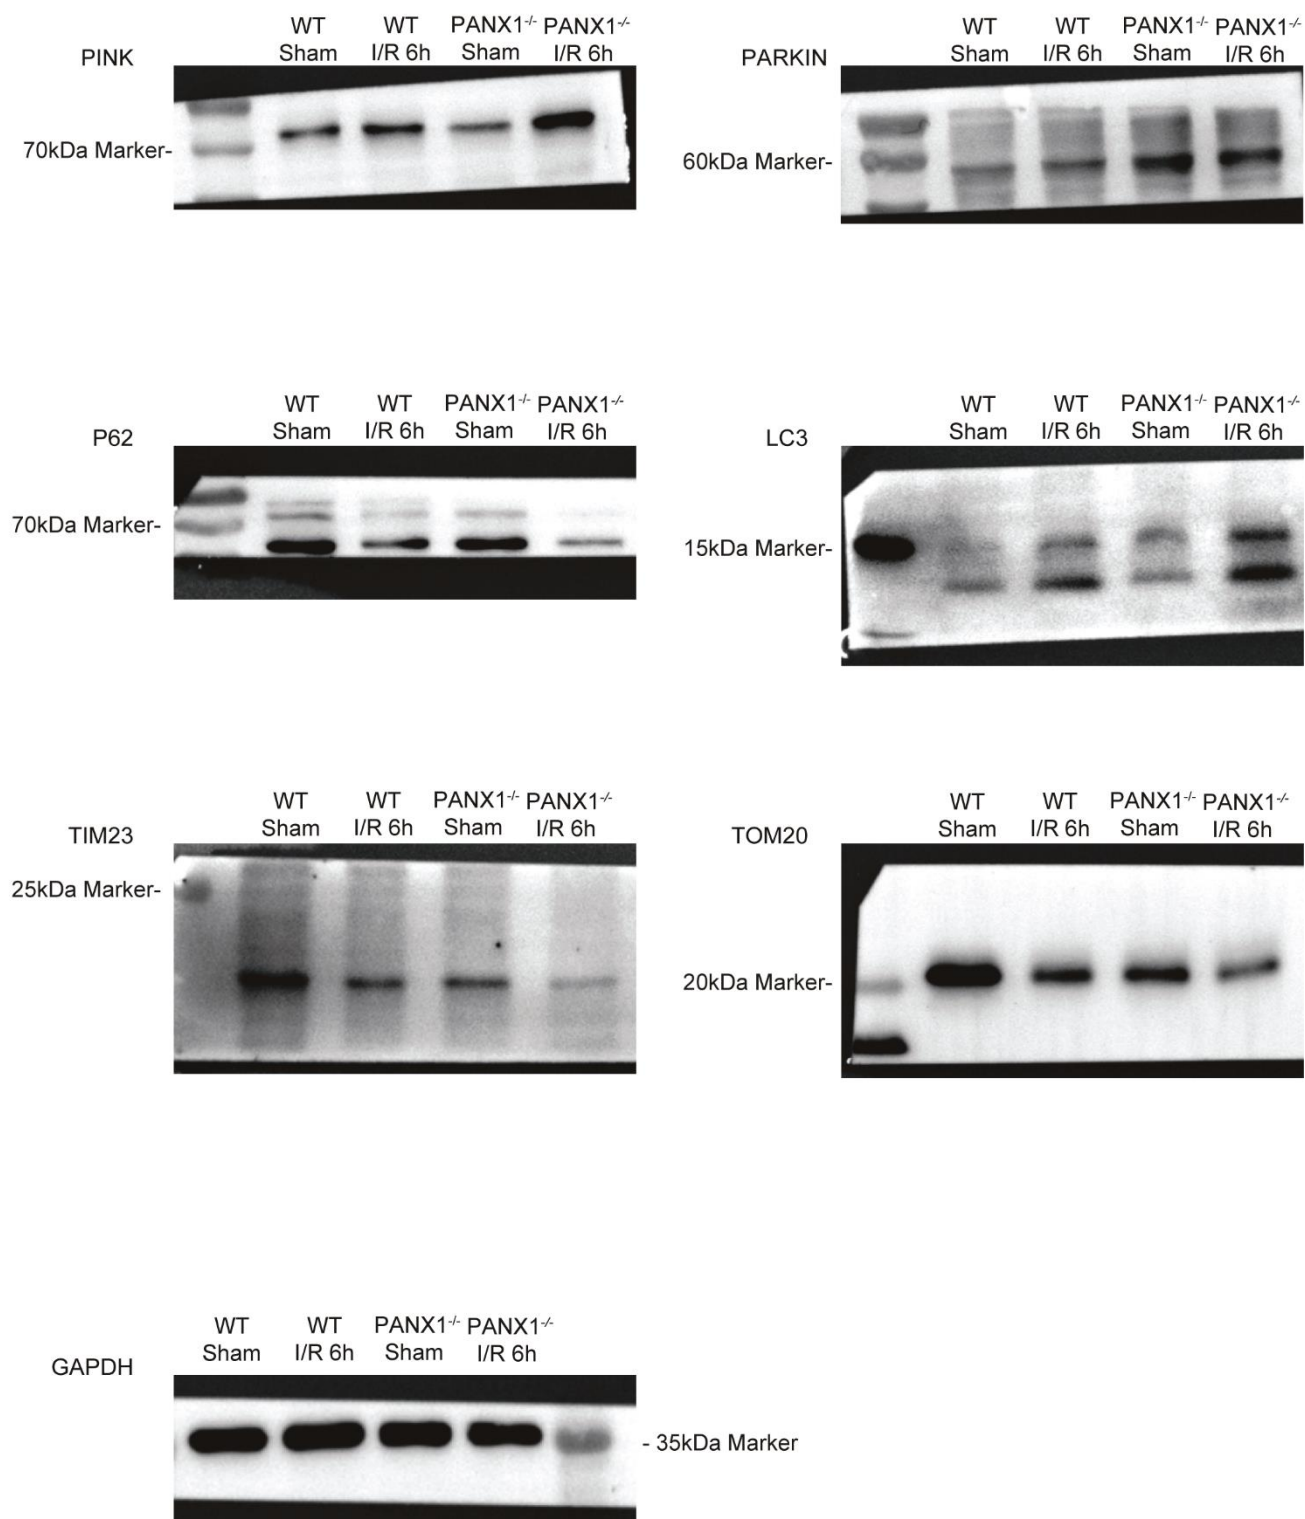

Supplementary Figure 4. Original blot images

Figure 6c

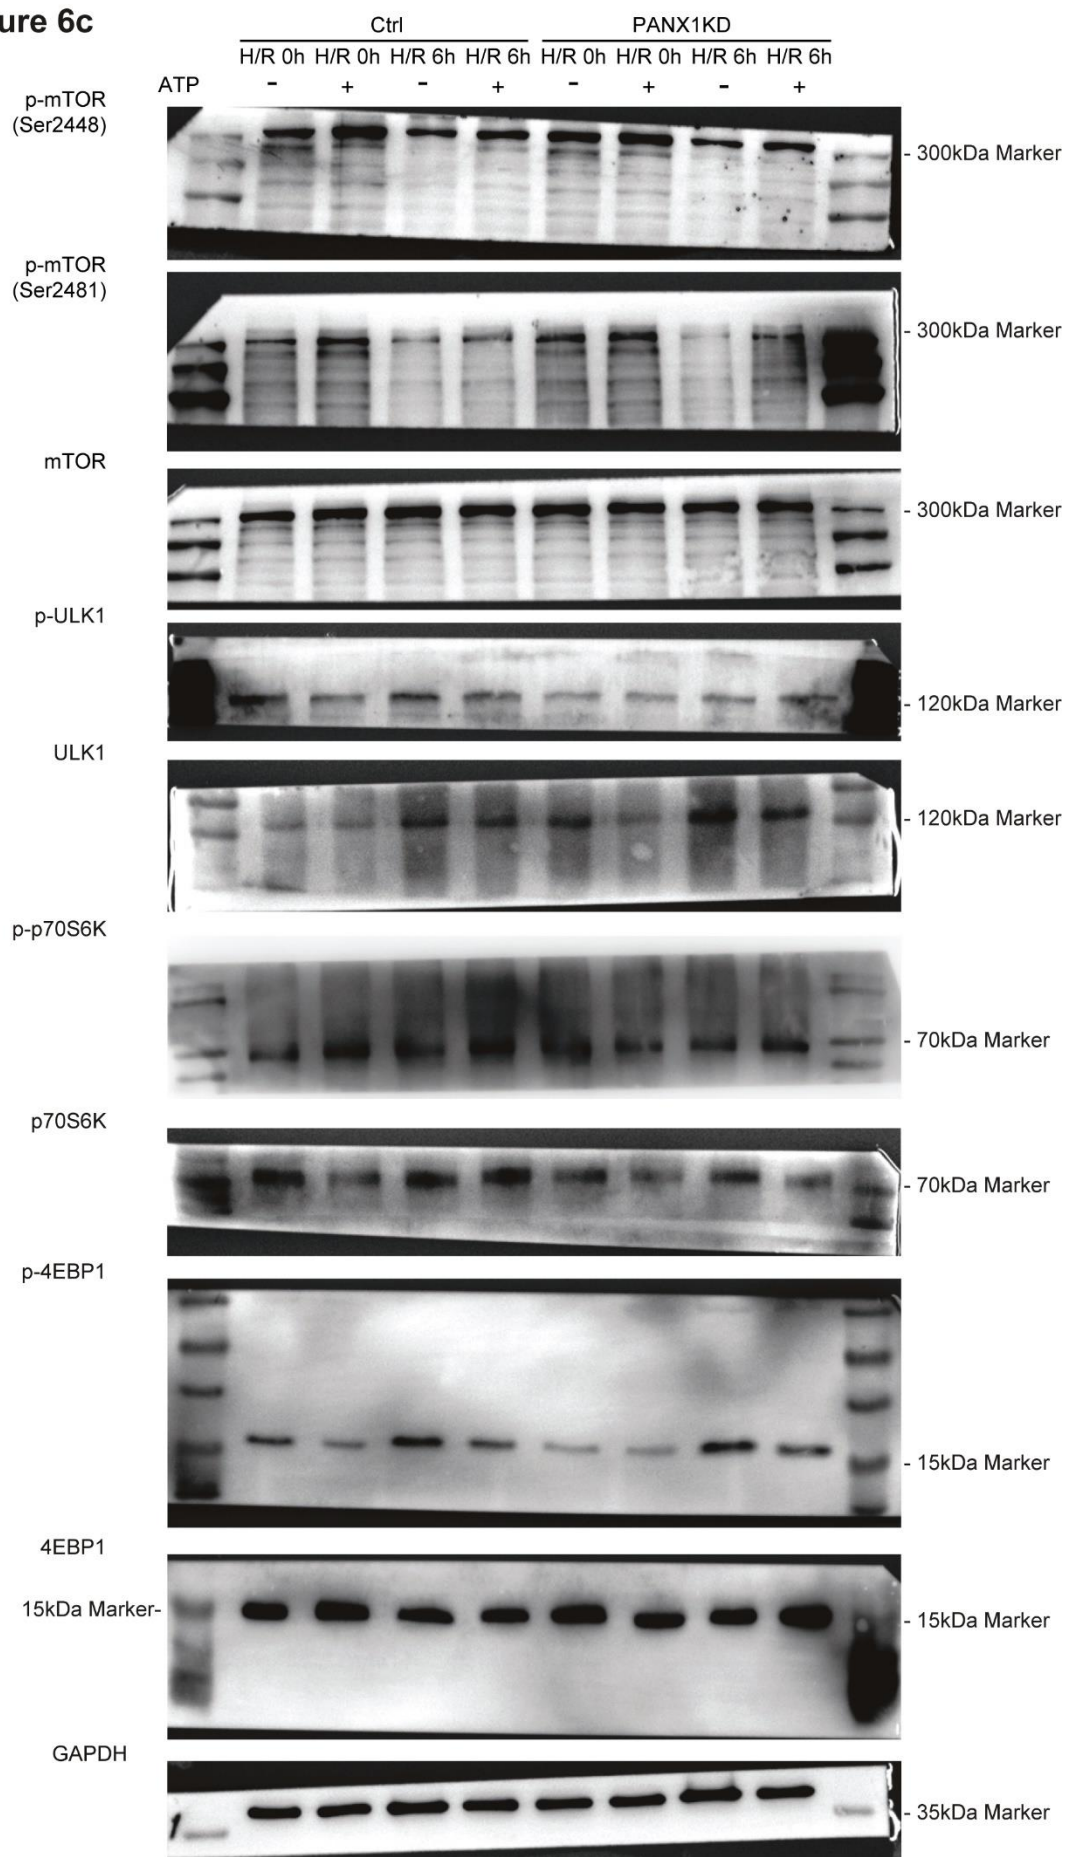

## Supplementary Figure 4. Original blot images

**Figure 6e**

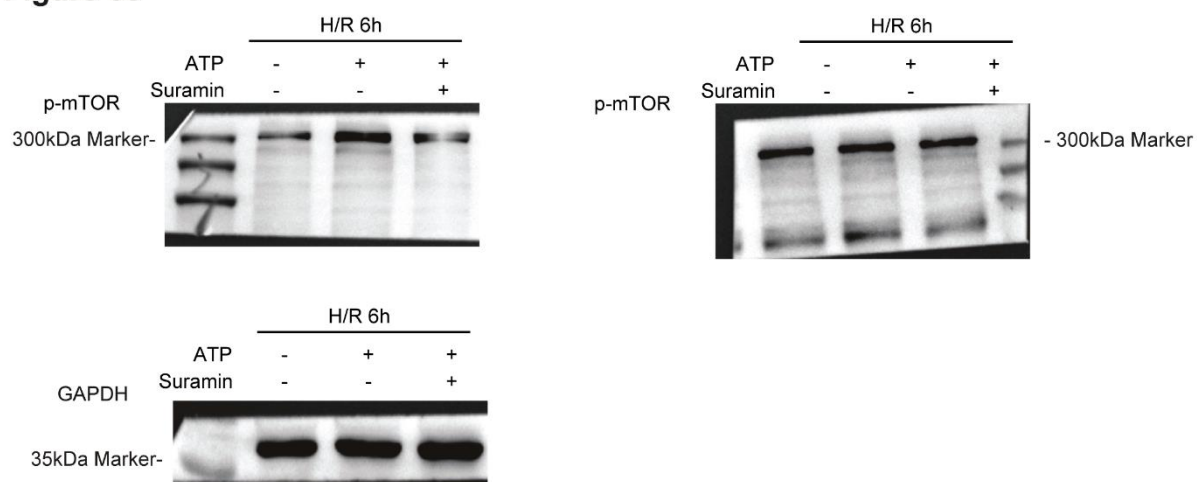

**Figure 6g**

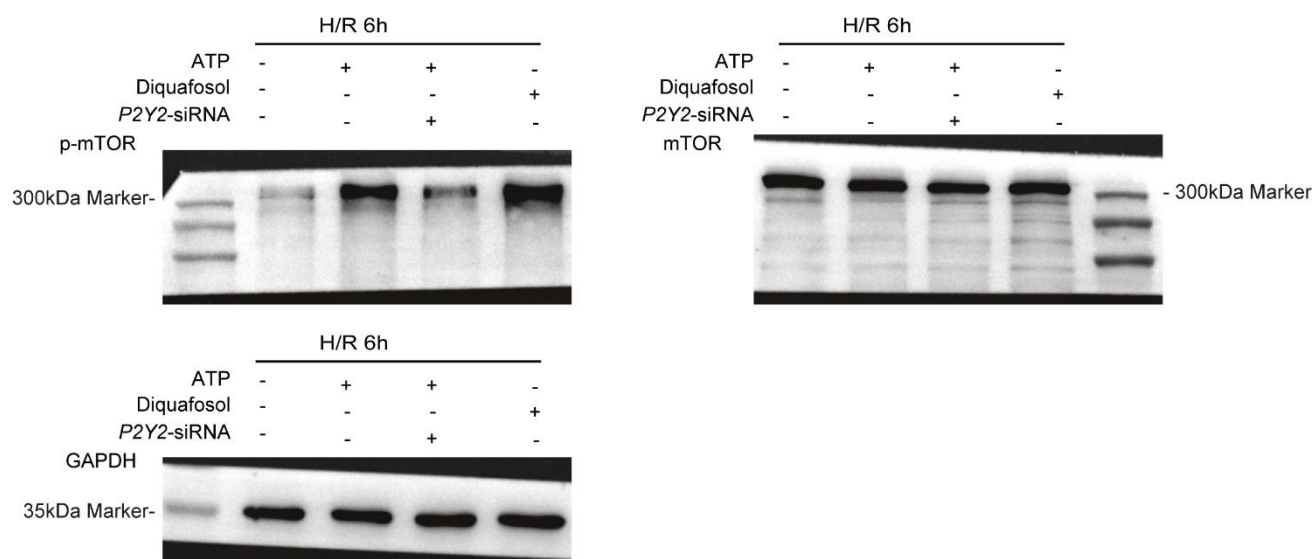



Supplementary Figure 4. Original blot images

Figure 6i

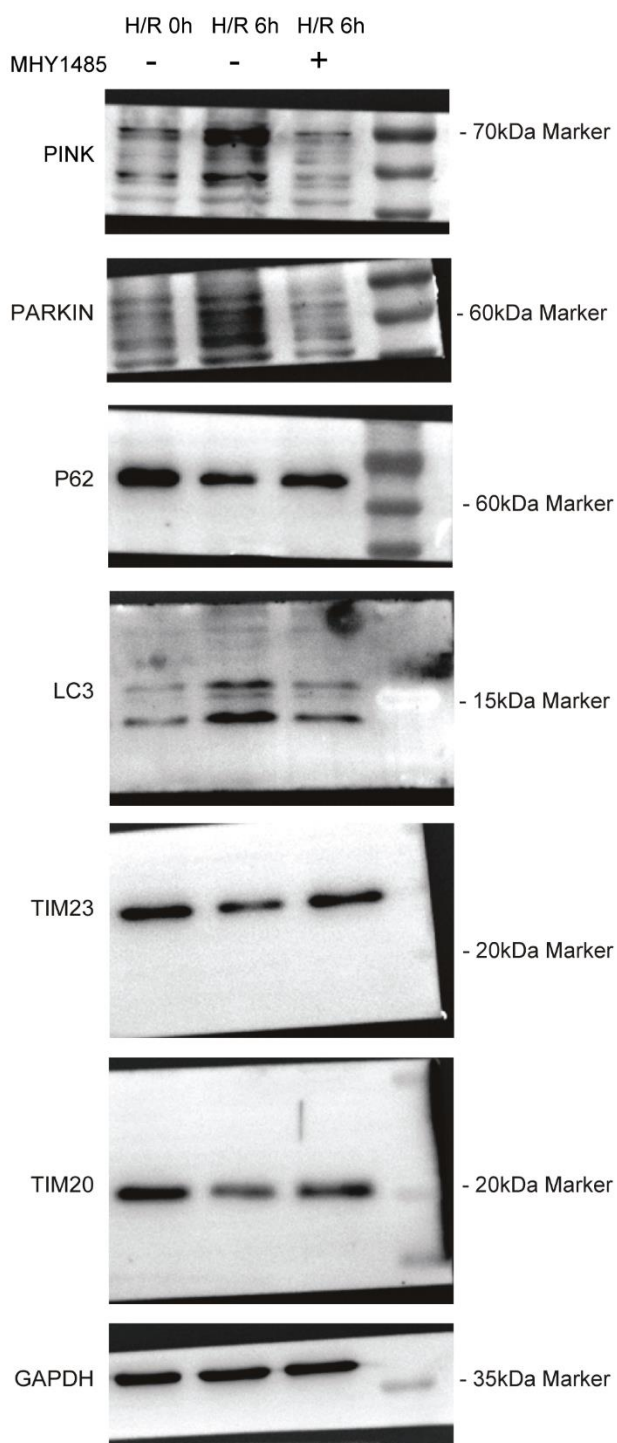

Figure 6k

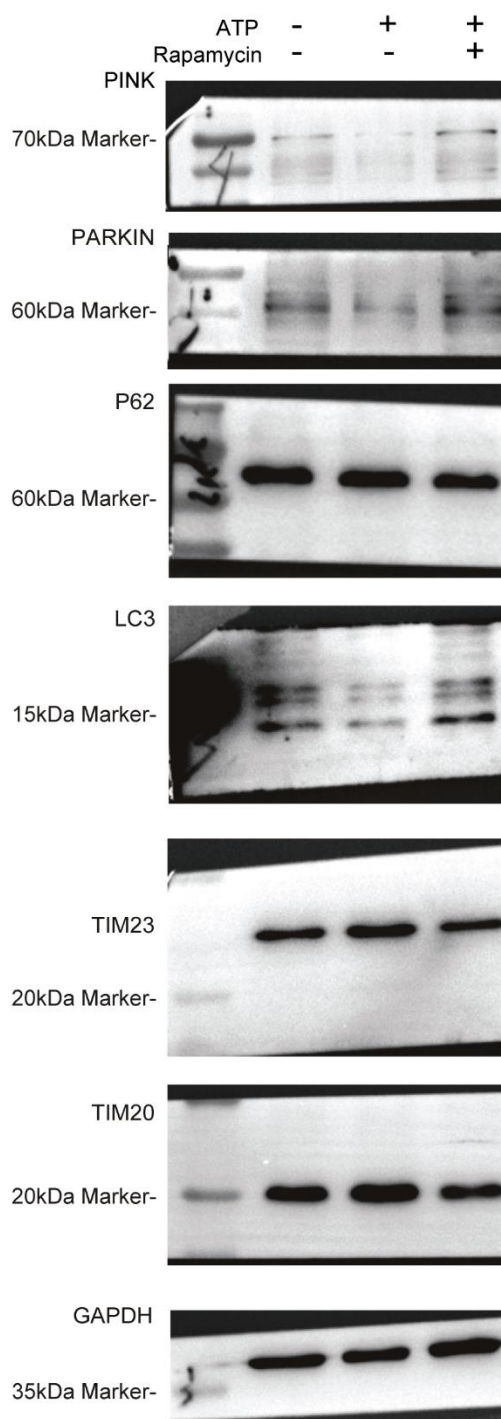

## Supplementary Figure 4. Original blot images

### Supplementary Figure 1c

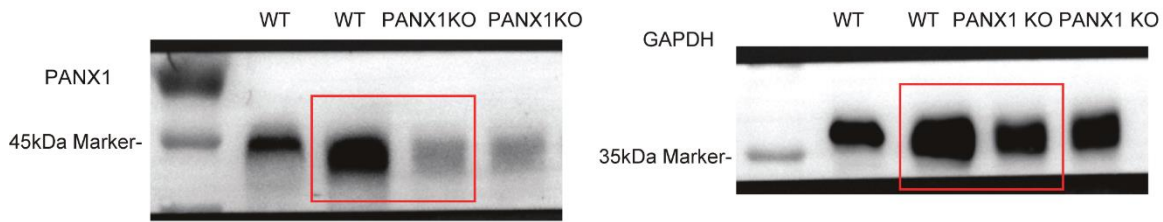

### Supplementary Figure 1d

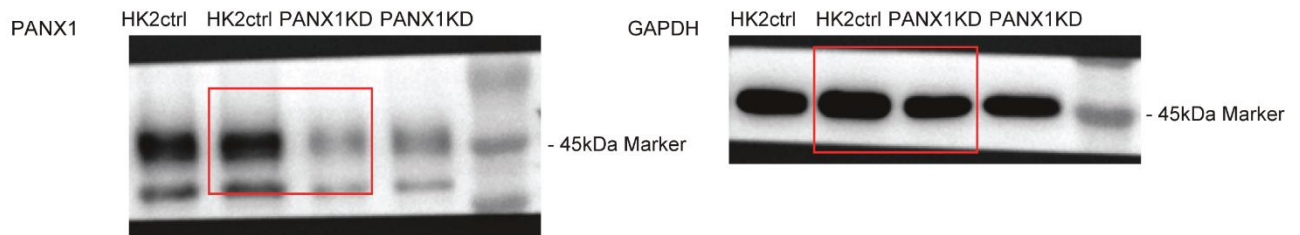

### Supplementary Figure 1e

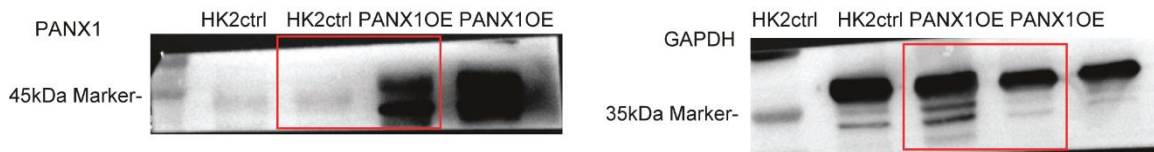

Supplementary Figure 4. Original blot images

Supplementary Figure 2a

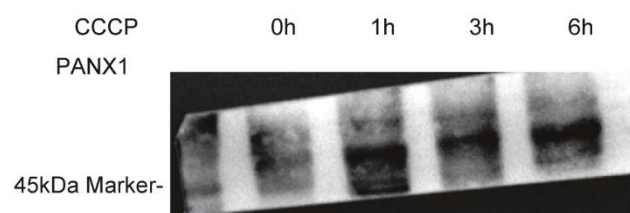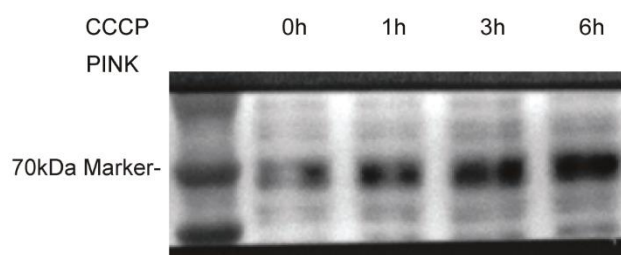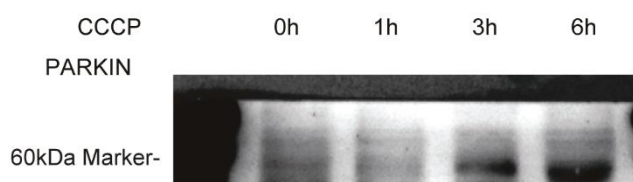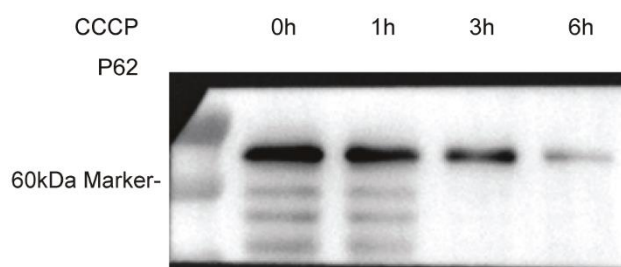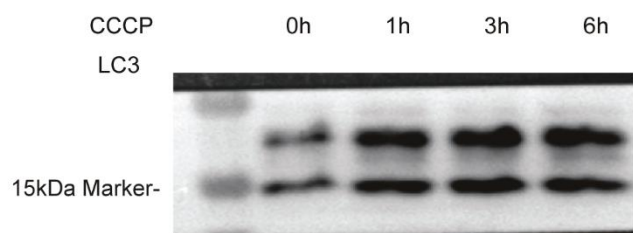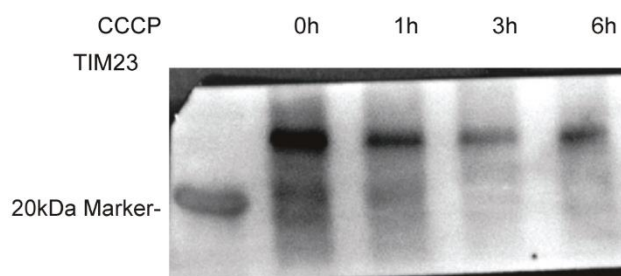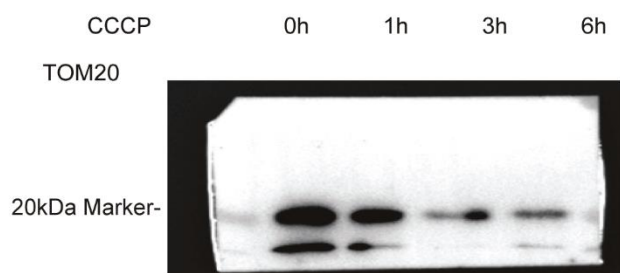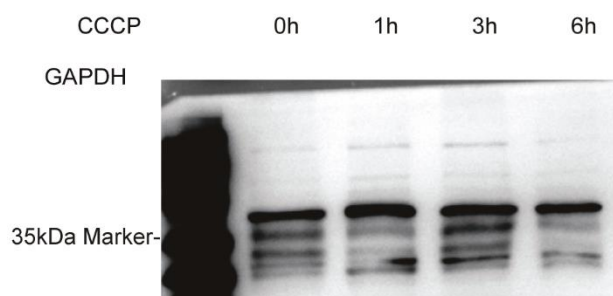

## Supplementary Figure 4. Original blot images

### Supplementary Figure 2c

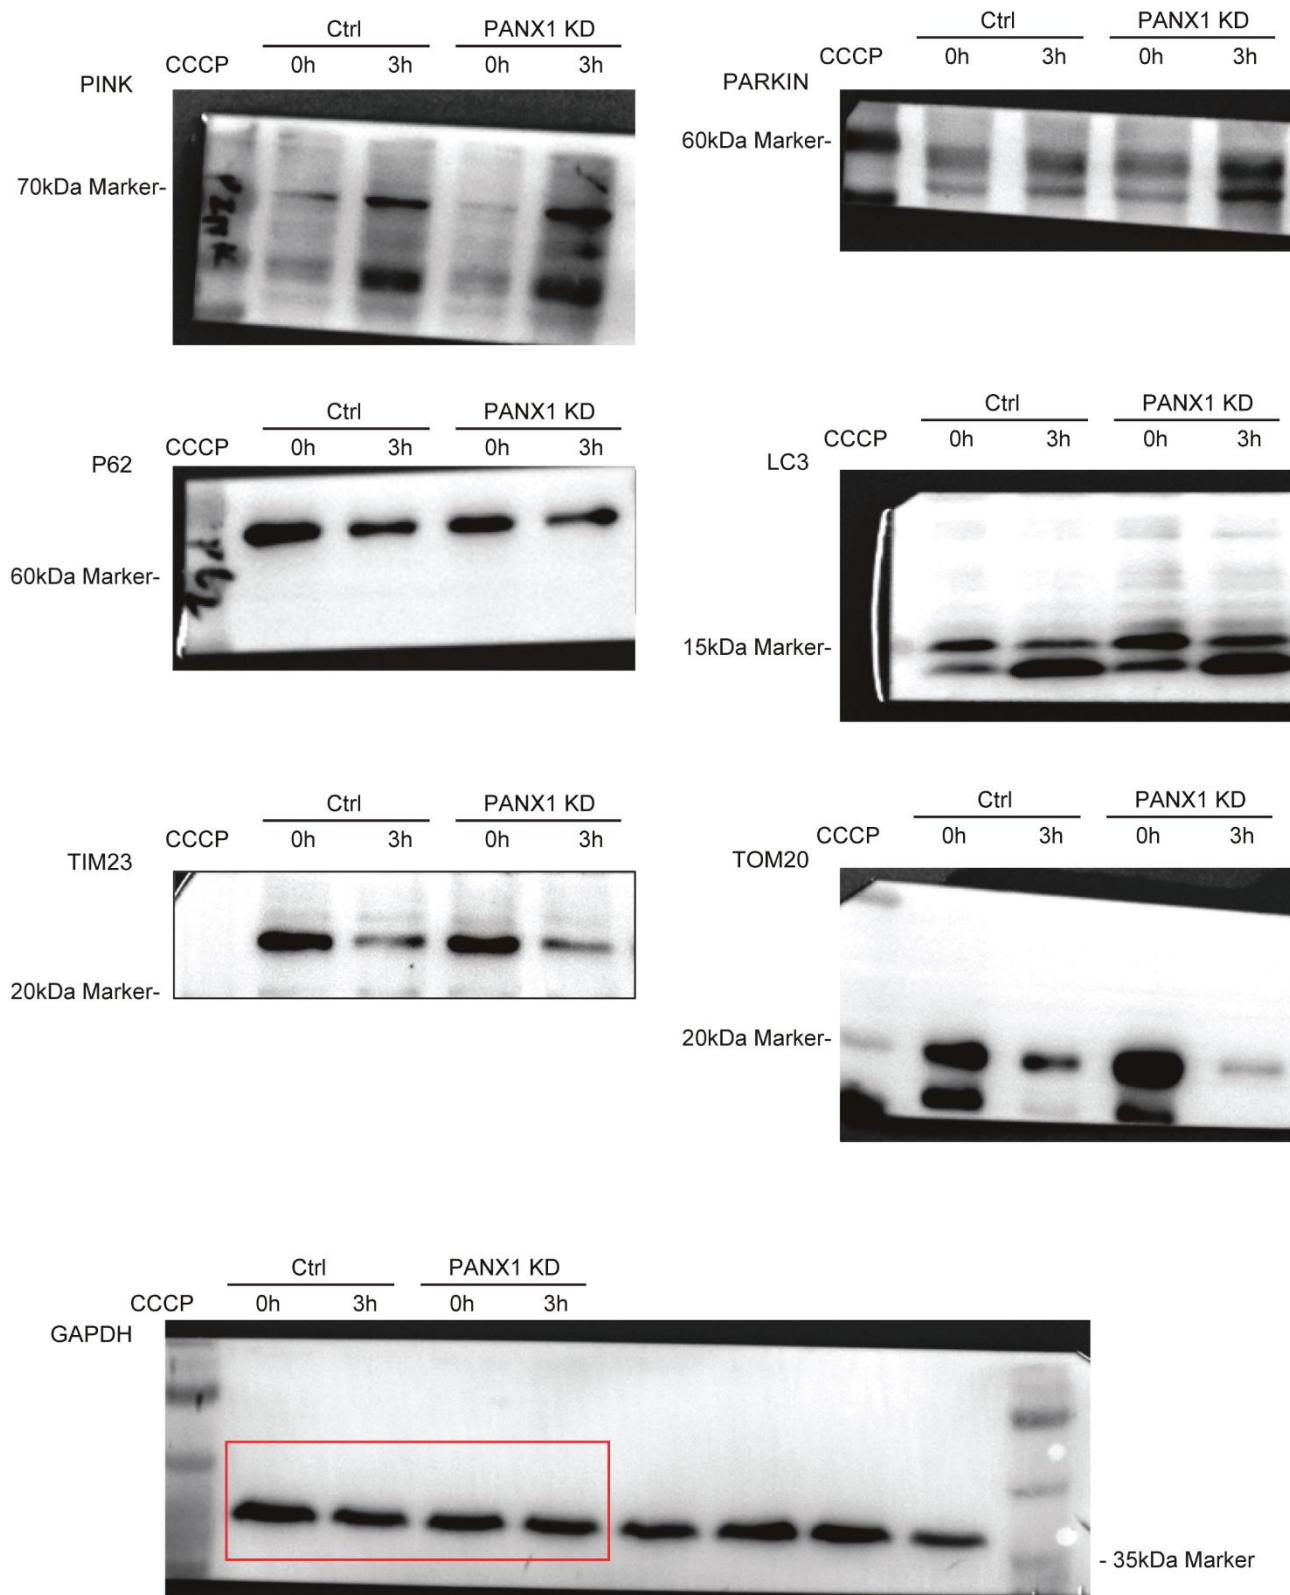

## Supplementary Figure 4. Original blot images

### Supplementary Figure 2e

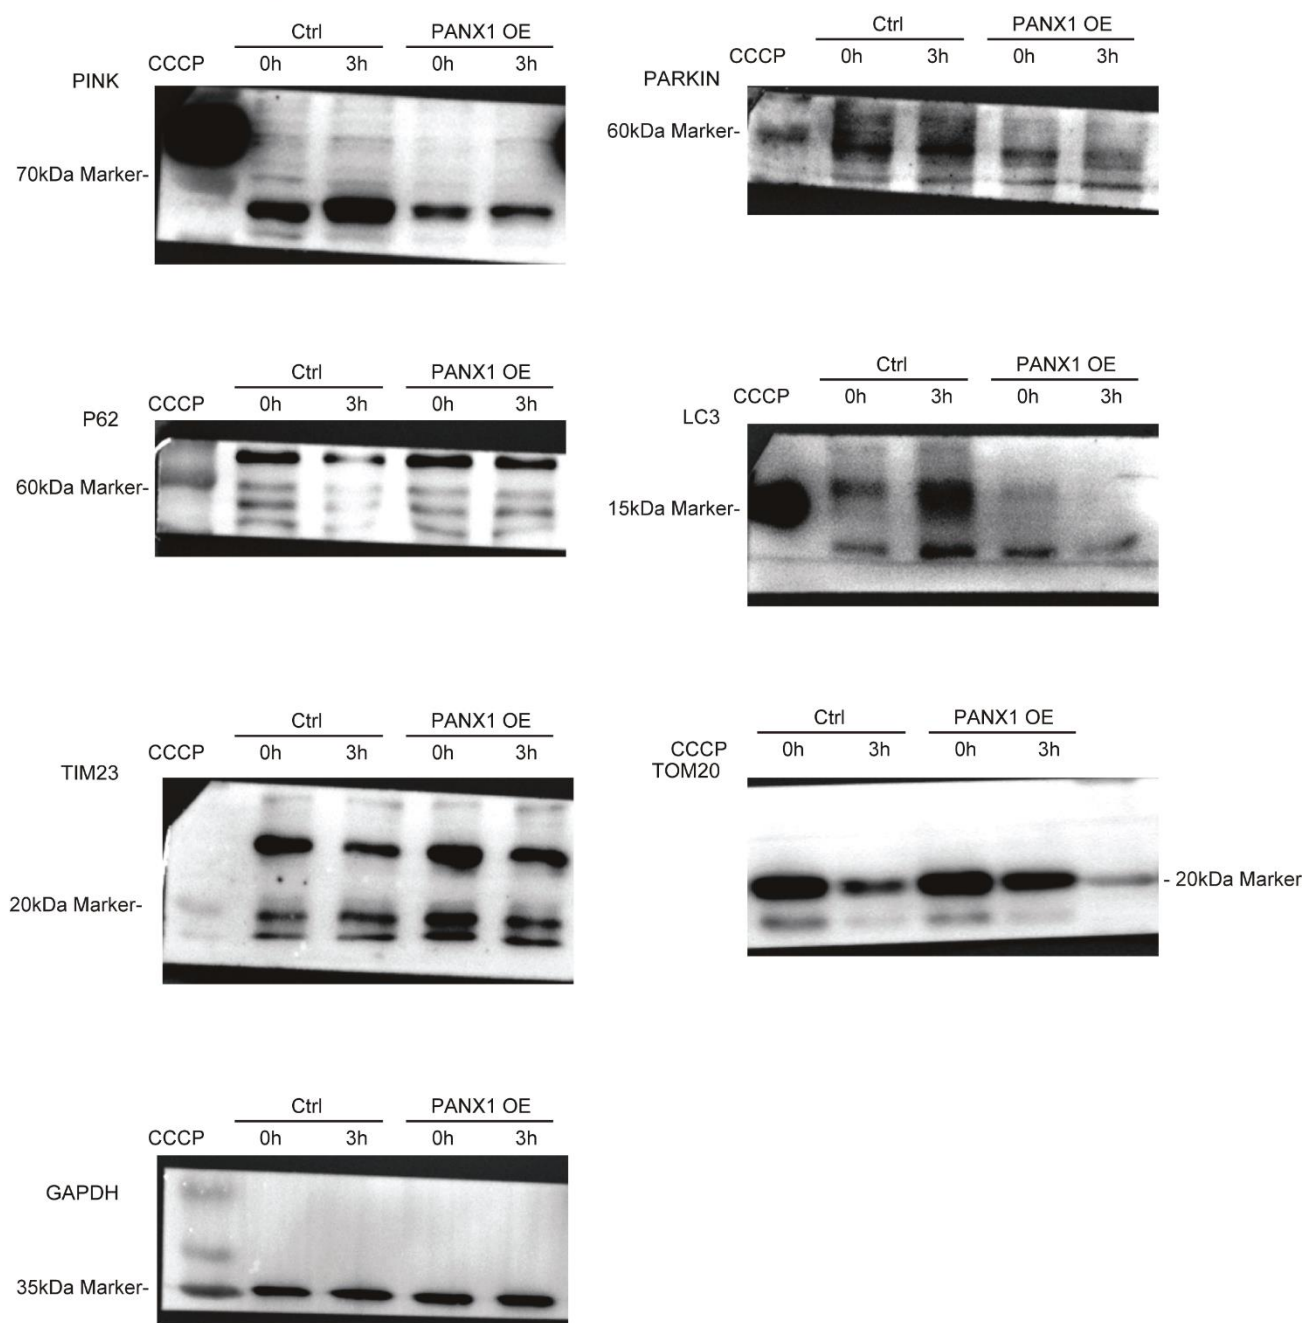

Supplement: 42003_2023_5226_MOESM1_ESM.pdf [file 42003_2023_5226_MOESM1_ESM.pdf]
