# Supplementary material for: Pannexin 1 targets mitophagy to mediate renal ischemia/reperfusion injury
Source: PubMed Central journal article supplement (PMC10465551; doi:10.1038/s42003-023-05226-x), 2023-08-29
Supplement: 42003_2023_5226_MOESM2_ESM.pdf [file 42003_2023_5226_MOESM2_ESM.pdf]

## Description of Additional Supplementary Files

**File name:** Supplementary Data

**Description:** Numerical source data for Figs. 1, 2, 3, 4, 5, 6 and Supplementary Figs.

1, 2
