# Supplementary material for: Pannexin 1 targets mitophagy to mediate renal ischemia/reperfusion injury
Source: PubMed Central journal article supplement (PMC10465551; doi:10.1038/s42003-023-05226-x), 2023-08-29
Supplement: 42003_2023_5226_MOESM4_ESM.pdf [file 42003_2023_5226_MOESM4_ESM.pdf]

## Reporting Summary

Nature Portfolio wishes to improve the reproducibility of the work that we publish. This form provides structure for consistency and transparency in reporting. For further information on Nature Portfolio policies, see our [Editorial Policies](#) and the [Editorial Policy Checklist](#).

### Statistics

For all statistical analyses, confirm that the following items are present in the figure legend, table legend, main text, or Methods section.

n/a Confirmed

- The exact sample size ( $n$ ) for each experimental group/condition, given as a discrete number and unit of measurement
- A statement on whether measurements were taken from distinct samples or whether the same sample was measured repeatedly
- The statistical test(s) used AND whether they are one- or two-sided  
*Only common tests should be described solely by name; describe more complex techniques in the Methods section.*
- A description of all covariates tested
- A description of any assumptions or corrections, such as tests of normality and adjustment for multiple comparisons
- A full description of the statistical parameters including central tendency (e.g. means) or other basic estimates (e.g. regression coefficient) AND variation (e.g. standard deviation) or associated estimates of uncertainty (e.g. confidence intervals)
- For null hypothesis testing, the test statistic (e.g.  $F$ ,  $t$ ,  $r$ ) with confidence intervals, effect sizes, degrees of freedom and  $P$  value noted  
*Give  $P$  values as exact values whenever suitable.*
- For Bayesian analysis, information on the choice of priors and Markov chain Monte Carlo settings
- For hierarchical and complex designs, identification of the appropriate level for tests and full reporting of outcomes
- Estimates of effect sizes (e.g. Cohen's  $d$ , Pearson's  $r$ ), indicating how they were calculated

*Our web collection on [statistics for biologists](#) contains articles on many of the points above.*

### Software and code

Policy information about [availability of computer code](#)

Data collection

Data analysis

For manuscripts utilizing custom algorithms or software that are central to the research but not yet described in published literature, software must be made available to editors and reviewers. We strongly encourage code deposition in a community repository (e.g. GitHub). See the Nature Portfolio [guidelines for submitting code & software](#) for further information.

### Data

Policy information about [availability of data](#)

All manuscripts must include a [data availability statement](#). This statement should provide the following information, where applicable:

- Accession codes, unique identifiers, or web links for publicly available datasets
- A description of any restrictions on data availability
- For clinical datasets or third party data, please ensure that the statement adheres to our [policy](#)

## Research involving human participants, their data, or biological material

Policy information about studies with [human participants or human data](#). See also policy information about [sex, gender \(identity/presentation\), and sexual orientation](#) and [race, ethnicity and racism](#).

|                                                                    |                                                                                                                                                                                                                                                                                                                                                                                                                                                                                                                                                                                                                                                                                                                                                        |
|--------------------------------------------------------------------|--------------------------------------------------------------------------------------------------------------------------------------------------------------------------------------------------------------------------------------------------------------------------------------------------------------------------------------------------------------------------------------------------------------------------------------------------------------------------------------------------------------------------------------------------------------------------------------------------------------------------------------------------------------------------------------------------------------------------------------------------------|
| Reporting on sex and gender                                        | Approved by the ethics committee of Central South Hospital of Wuhan University in accordance with the principles of the declaration of Helsinki, the patients who were transferred to the intensive care unit after cardiopulmonary bypass surgery in Zhongnan Hospital of Wuhan University from January 1 to June 30, 2019 were included in this study. Patients who had AKI, chronic kidney disease, end-stage renal disease, tumor and had received renal replacement therapy were excluded from the study. Patients aged under 18 years or over 80 years and those who did not fill in the consent form were also excluded. With the informed consent of the patient or their family members, we have confirmed the biological sex of the patient. |
| Reporting on race, ethnicity, or other socially relevant groupings | Approved by the ethics committee of Central South Hospital of Wuhan University in accordance with the principles of the declaration of Helsinki, the patients who were transferred to the intensive care unit after cardiopulmonary bypass surgery in Zhongnan Hospital of Wuhan University from January 1 to June 30, 2019 were included in this study. Patients who had AKI, chronic kidney disease, end-stage renal disease, tumor and had received renal replacement therapy were excluded from the study. Patients aged under 18 years or over 80 years and those who did not fill in the consent form were also excluded.                                                                                                                        |
| Population characteristics                                         | See above                                                                                                                                                                                                                                                                                                                                                                                                                                                                                                                                                                                                                                                                                                                                              |
| Recruitment                                                        | The patients who were transferred to the intensive care unit after cardiopulmonary bypass surgery in Zhongnan Hospital of Wuhan University from January 1 to June 30, 2019 were included in this study. Patients who had AKI, chronic kidney disease, end-stage renal disease, tumor and had received renal replacement therapy were excluded from the study. Patients aged under 18 years or over 80 years and those who did not fill in the consent form were also excluded.                                                                                                                                                                                                                                                                         |
| Ethics oversight                                                   | Approved by the ethics committee of Central South Hospital of Wuhan University in accordance with the principles of the declaration of Helsinki.                                                                                                                                                                                                                                                                                                                                                                                                                                                                                                                                                                                                       |

Note that full information on the approval of the study protocol must also be provided in the manuscript.

## Field-specific reporting

Please select the one below that is the best fit for your research. If you are not sure, read the appropriate sections before making your selection.

Life sciences       Behavioural & social sciences       Ecological, evolutionary & environmental sciences

For a reference copy of the document with all sections, see [nature.com/documents/nr-reporting-summary-flat.pdf](https://www.nature.com/documents/nr-reporting-summary-flat.pdf)

## Life sciences study design

All studies must disclose on these points even when the disclosure is negative.

|                 |                                                                                                                                                                                                                                                                                                                                   |
|-----------------|-----------------------------------------------------------------------------------------------------------------------------------------------------------------------------------------------------------------------------------------------------------------------------------------------------------------------------------|
| Sample size     | This study was a prospective observational research study performed in a 58-bed closed ICU of a 3300-bed tertiary center. The patients who were transferred to the intensive care unit after cardiopulmonary bypass surgery in Zhongnan Hospital of Wuhan University from January 1 to June 30, 2019 were included in this study. |
| Data exclusions | Patients who had AKI, chronic kidney disease, end-stage renal disease, tumor and had received renal replacement therapy were excluded from the study. Patients aged under 18 years or over 80 years and those who did not fill in the consent form were also excluded.                                                            |
| Replication     | This study was a prospective observational research study.                                                                                                                                                                                                                                                                        |
| Randomization   | This study was a prospective observational research study.                                                                                                                                                                                                                                                                        |
| Blinding        | This study was a prospective observational research study.                                                                                                                                                                                                                                                                        |

## Reporting for specific materials, systems and methods

We require information from authors about some types of materials, experimental systems and methods used in many studies. Here, indicate whether each material, system or method listed is relevant to your study. If you are not sure if a list item applies to your research, read the appropriate section before selecting a response.

## Materials &amp; experimental systems

## Methods

- n/a  Involved in the study
- Antibodies
- Eukaryotic cell lines
- Palaeontology and archaeology
- Animals and other organisms
- Clinical data
- Dual use research of concern
- Plants

- n/a  Involved in the study
- ChIP-seq
- Flow cytometry
- MRI-based neuroimaging

## Antibodies

## Antibodies used

PANX1 12595-1-AP Proteintech rabbit  
 PANX1 #91137 Cell Signaling Technology rabbit  
 PANX1 sc-293210 Santa Cruz mouse  
 GAPDH 60004-1-Ig Proteintech mouse  
 LC3B 18725-1-AP Proteintech rabbit  
 LC3 14600-1-AP Proteintech rabbit  
 P62 18420-1-AP Proteintech rabbit  
 TOM20 11802-1-AP Proteintech rabbit  
 TIM23 67535-1-Ig Proteintech mouse  
 PINK DF7742 Affinity rabbit  
 PARKIN AF0235 Affinity rabbit  
 Caspase 3 19677-1-AP Proteintech rabbit  
 Bax 50599-2-Ig Proteintech rabbit  
 Bcl2 26593-1-AP Proteintech rabbit  
 mTOR #2972 Cell Signaling Technology rabbit  
 Phospho-mTOR(Ser2448) #5536 Cell Signaling Technology rabbit  
 Phospho-mTOR(Ser2481) #2974 Cell Signaling Technology rabbit  
 Phospho-ULK1 AF4387 Affinity rabbit  
 Phospho-4E-BP1 AF3432 Affinity rabbit  
 p70 S6 Kinase AF6226 Affinity rabbit  
 ULK1 AF7588 Affinity rabbit  
 4E-BP1 AF4387 Affinity rabbit

## Validation

The validation of each primary antibody for the species and application could be acquired in the manufacturer's website.

## Animals and other research organisms

Policy information about [studies involving animals](#); [ARRIVE guidelines](#) recommended for reporting animal research, and [Sex and Gender in Research](#)

## Laboratory animals

C57BL/6J wild-type (WT) mice and PANX1 knockout (PANX1<sup>-/-</sup>) mice were used in the study.

## Wild animals

C57BL/6J wild-type (WT) mice and PANX1<sup>-/-</sup> mice were purchased from Gem Pharmatech Co. Ltd. (Nanjing, China), and were created from C57BL/6J wild-type mice and PANX1<sup>+/-</sup> mice.

## Reporting on sex

All mice used for experiments were 8-10 weeks old males

## Field-collected samples

All mice used for experiments were raised under specific pathogen-free and controlled temperature conditions with a 12h light/dark cycle.

## Ethics oversight

All animal experiments were approved by The Animal Care and Use Committee of Zhongnan Hospital of Wuhan University. All animal experimental procedures were performed in accordance with national and EU guidelines. Additionally, all animals were provided humane care according to the ARRIVE guidelines.

Note that full information on the approval of the study protocol must also be provided in the manuscript.

## Plots

Confirm that:

- The axis labels state the marker and fluorochrome used (e.g. CD4-FITC).
- The axis scales are clearly visible. Include numbers along axes only for bottom left plot of group (a 'group' is an analysis of identical markers).
- All plots are contour plots with outliers or pseudocolor plots.
- A numerical value for number of cells or percentage (with statistics) is provided.

## Methodology

|                           |                                                                                                                                                                                                                                  |
|---------------------------|----------------------------------------------------------------------------------------------------------------------------------------------------------------------------------------------------------------------------------|
| Sample preparation        | After trypsinization, $10^6$ cells were collected, the cells were collected and analyzed by flow cytometry.                                                                                                                      |
| Instrument                | cytoFlex S (BECKMAN)                                                                                                                                                                                                             |
| Software                  | CytExpert                                                                                                                                                                                                                        |
| Cell population abundance | After trypsinization, $10^6$ cells were collected, the cells were collected and analyzed by flow cytometry.                                                                                                                      |
| Gating strategy           | Single parameter histograms were applied to density plots to exclude debris.<br>Unstained controls and single color stained controls, were used to defend boundaries between "positive" and "negative" staining cell populations |

- Tick this box to confirm that a figure exemplifying the gating strategy is provided in the Supplementary Information.
